# Supplementary material for: Infection-induced glucose starvation triggers NINJ1-dependent macrophage lysis and pathogen escape
Source: Research Square preprint supplement (doi:10.21203/rs.3.rs-7015602/v1), 2025-07-10
Supplement: Supplementary file 1 [file 86f2f832fb9afa318b55ff9b.xlsx]

## Sheet: Figure 1B
Time (hours)	Candida				Candida + 10mM Glu				Candida +40mM Glu				Candida + 10mM Ala				Candida +40mM Ala				Uninfected				Uninfected + 40mM Glu				uninfected+40mM Ala
	Replicate 1	Replicate 2	Replicate 3	Mean	Replicate 1	Replicate 2	Replicate 3	Mean	Replicate 1	Replicate 2	Replicate 3	Mean	Replicate 1	Replicate 2	Replicate 3	Mean	Replicate 1	Replicate 2	Replicate 3	Mean	Replicate 1	Replicate 2	Replicate 3	Mean	Replicate 1	Replicate 2	Replicate 3	Mean	Replicate 1	Replicate 2	Replicate 3	Mean
2.5	3.62455	5.16222	5.0239	4.60356	3.52893	3.52893	4.67688	3.91158	4.46832	4.46832	4.26009	4.39891	2.20459	3.60855	3.7215	3.17821	2.27556	5.08666	3.72417	3.69546	4.42195	4.0679	2.07098	3.52028	2.70496	1.66706	1.19837	1.85679	3.14985	4.17034	3.2018	3.50733
3	4.19774	5.49141	5.62823	5.10579	4.25686	4.25686	5.62374	4.71249	5.47362	5.47362	6.77853	5.90859	2.47518	4.1961	6.32803	4.3331	2.44606	4.79869	3.28626	3.51034	5.65424	5.07293	3.69521	4.80746	2.94692	2.48601	1.57307	2.33533	3.3797	5.62715	4.39368	4.46685
3.5	4.73716	6.06252	6.13558	5.64509	4.78035	4.78035	6.48856	5.34975	3.65543	5.85798	6.73169	5.41503	2.90897	4.10869	5.86655	4.29474	2.48479	5.57387	3.27397	3.77754	6.26999	5.49329	4.18981	5.3177	3.48272	2.83629	1.80774	2.70892	3.63998	6.12303	4.39199	4.71833
4	5.48931	6.46835	6.15097	6.03621	5.45575	5.45575	5.42271	5.44474	6.34198	6.34198	7.57628	6.75342	3.58704	3.42971	5.58616	4.20097	3.59585	5.05119	3.53697	4.06134	6.63803	5.36065	4.20832	5.40233	3.67874	2.72647	1.98766	2.79762	3.80198	6.26909	4.36247	4.81118
4.5	6.29629	7.05207	7.60916	6.98584	6.14884	6.14884	6.32134	6.20634	7.83119	7.83119	8.28342	7.98193	4.02083	4.23031	5.9794	4.74351	4.70971	5.05158	3.68156	4.48095	6.56961	5.78101	4.48332	5.61131	3.92034	2.71346	1.82768	2.82049	3.79921	6.34792	4.49954	4.88222
5	6.98091	7.66152	8.64118	7.7612	6.65411	6.65411	6.52152	6.60991	5.24847	8.91108	9.34343	7.83433	4.46338	3.91121	5.14745	4.50735	4.86918	4.27624	4.89777	4.68106	6.74498	5.50077	4.34042	5.52872	4.15785	2.70904	2.14765	3.00485	3.96677	6.58041	4.62627	5.05782
5.5	7.27106	8.02932	10.0944	8.46491	7.2112	8.03445	7.20411	7.48325	8.16458	8.16458	8.8758	8.40165	4.8605	5.1165	7.40974	5.79558	5.98759	5.26784	5.68247	5.64597	6.53816	5.86441	4.52823	5.6436	4.28198	2.83994	2.30763	3.14318	3.7106	6.57267	4.38692	4.89006
6	7.83866	8.24451	11.8694	9.31754	7.75255	8.559	7.4582	7.92325	9.17076	9.17076	8.71588	9.01913	5.4756	6.34667	9.81551	7.21259	6.8165	6.18804	6.29242	6.43232	6.34313	5.00448	4.2003	5.18264	4.30125	2.58647	2.07253	2.98675	3.88226	6.58422	4.31227	4.92625
6.5	8.63447	8.70104	12.297	9.87749	8.04046	9.13253	9.30708	8.82669	8.99551	8.99551	11.4666	9.81921	5.94605	7.47669	11.986	8.46957	7.55779	6.6027	6.62692	6.92914	6.11665	4.76175	3.9594	4.94593	4.51691	2.52791	1.87266	2.9725	3.75213	6.92827	4.44069	5.04036
7	9.12731	9.94294	12.6779	10.5827	8.34341	10.1342	10.3803	9.61931	6.74688	10.2986	12.4818	9.84241	6.29314	7.68833	12.4763	8.81925	8.25579	7.03558	7.2932	7.52819	5.86106	5.42983	4.52283	5.27124	4.39722	2.83968	1.87776	3.03822	3.57491	7.25114	4.58999	5.13868
7.5	9.55568	11.4914	13.1477	11.3983	9.91352	10.4218	11.1554	10.4969	11.6112	11.6112	15.6572	12.9598	6.86999	7.69276	12.496	9.01957	8.81727	7.3065	7.67125	7.93168	5.69985	5.46818	4.34829	5.17211	4.61066	2.76395	1.868	3.08087	3.62199	7.72584	4.5708	5.30621
8	10.0064	12.583	13.8467	12.1454	10.2014	10.5398	14.2863	11.6758	12.3411	12.3411	16.7938	13.8253	7.44742	7.83175	13.1481	9.47577	9.2128	7.59509	7.75281	8.1869	5.64402	5.32223	4.3932	5.11981	4.78296	2.83552	1.93335	3.18394	3.76046	7.40874	4.53621	5.23514
8.5	11.0711	13.3692	15.4936	13.3113	10.321	10.6614	15.3378	12.1068	13.5799	13.5799	19.249	15.4696	8.05676	8.16922	13.4884	9.90481	9.85455	8.31705	10.3613	9.51098	5.84141	5.13457	3.91974	4.96524	5.16647	2.6458	1.79375	3.20201	3.68983	7.37798	4.41644	5.16142
9	11.7697	14.9791	18.1574	14.9687	10.4558	10.4611	16.4952	12.4707	9.05921	15.8736	22.0425	15.6584	8.21995	8.56479	13.7693	10.1847	10.1791	9.07496	11.8682	10.3741	5.68334	5.0353	4.02545	4.9147	4.90709	2.68328	1.75852	3.1163	3.64831	7.42605	4.40083	5.1584
9.5	12.8049	17.857	23.0802	17.9141	10.9302	11.302	17.308	13.1801	9.65205	15.6864	23.1078	16.1487	8.90938	9.13879	14.2233	10.7572	10.6586	10.1572	12.7998	11.2052	5.72187	4.87682	3.81928	4.80599	4.96601	2.70462	1.76361	3.14475	3.84629	7.51446	4.45988	5.27354
10	14.4849	22.0402	30.8525	22.4592	10.6614	11.86	18.6014	13.7076	17.4592	17.4592	25.9229	20.2804	9.57034	9.95763	16.965	12.1643	11.2975	10.4278	14.2888	12.0047	5.61728	4.6975	3.91974	4.74484	4.89004	2.7257	1.72373	3.11316	3.93767	7.82001	4.43204	5.39658
10.5	17.6831	27.8461	40.0451	28.5248	10.4611	12.6187	18.6316	13.9038	11.7237	17.0372	25.0047	17.9219	10.9233	11.2473	17.8083	13.3263	12.1007	11.511	14.7998	12.8038	5.61964	4.65999	4.00168	4.76044	5.0579	2.53989	1.67874	3.09218	4.10523	7.34342	4.43731	5.29532
11	23.8691	35.0111	50.8644	36.5815	11.302	13.4807	19.0181	14.6002	12.449	18.0186	25.6044	18.6907	11.8307	12.0678	14.1017	12.6667	12.2924	11.962	15.3519	13.2021	5.77771	4.12869	3.62885	4.51175	5.03381	2.56123	1.45384	3.01629	4.1994	7.3242	4.34706	5.29022
11.5	32.5082	43.9901	62.1144	46.2042	16.941	16.941	19.6066	17.8295	18.5021	18.5021	25.7935	20.9326	12.0393	13.163	14.1625	13.1216	12.203	12.8094	15.3382	13.4502	5.64874	3.77253	3.38008	4.26711	4.86225	2.13522	1.41352	2.80366	3.88649	6.84577	4.00016	4.91081
12	43.1133	53.6075	71.8678	56.1962	26.6225	26.6225	20.5377	24.5942	13.0342	18.3877	26.6237	19.3485	12.2061	13.8381	14.2478	13.4307	12.5765	11.8703	16.0024	13.4831	5.5874	3.86176	3.23996	4.22971	4.58768	2.01682	1.41861	2.67437	4.17308	6.44984	4.18236	4.93509
12.5	53.4519	62.8454	78.7142	65.0038	37.5695	37.5695	23.3588	32.8326	17.1674	20.5764	27.2725	21.6721	13.1719	15.5919	14.1638	14.3092	13.1795	12.6828	15.9793	13.9472	5.87522	3.58067	2.65014	4.03535	4.76406	1.76361	1.22893	2.58553	4.33231	6.09811	3.81459	4.74834
13	63.8577	71.2989	84.9179	73.3582	51.0919	51.0919	31.0388	44.4075	18.0745	25.115	27.0655	23.4183	13.5531	17.5685	14.5868	15.2361	13.3095	12.6825	15.9387	13.9769	5.87994	3.5932	2.7665	4.07988	4.87744	1.4685	1.21917	2.52171	4.12189	6.13077	3.67414	4.64227
13.5	74.803	78.5848	89.0498	80.8126	63.2725	63.2725	40.7221	55.7557	18.559	27.8741	27.438	24.6237	13.8263	18.207	14.0072	15.3468	12.4133	12.5558	16.6917	13.8869	5.75097	3.38049	2.80354	3.97833	4.59398	1.97127	1.25397	2.6064	4.09835	6.05771	3.9603	4.70546
14	81.3477	84.5265	92.3433	86.0725	71.0924	71.0924	57.7723	66.6524	21.418	30.1474	28.3519	26.6391	13.8139	18.5603	13.8366	15.4036	12.3257	12.7363	16.9309	13.9976	5.8705	3.32293	2.81943	4.00429	4.29384	2.14849	1.26415	2.56883	3.99586	6.17885	4.04886	4.74119
14.5	87.8709	88.7022	93.3973	89.9901	83.308	83.308	70.9647	79.1936	26.8936	35.4473	31.2355	31.1922	14.1604	18.7233	14.1935	15.6924	11.8804	12.772	17.4743	14.0422	6.05531	3.19782	2.67391	3.97568	4.18045	2.25465	1.14915	2.52809	3.9419	5.63876	3.88058	4.48708
15	93.0127	92.5365	96.3821	93.9771	89.8891	89.8891	80.6245	86.8009	43.6989	44.222	39.7519	42.5576	14.7925	19.0228	14.5855	16.1336	11.5098	12.4115	17.6853	13.8689	6.10407	3.00348	2.65801	3.92185	4.26531	2.25491	1.22426	2.58149	4.00419	5.45428	3.63766	4.36537
15.5	93.451	95.6341	96.6734	95.2529	89.0135	89.0135	88.0978	88.7083	62.4855	57.4003	51.8088	57.2315	15.248	19.3467	14.9319	16.5089	10.2014	12.7	18.0046	13.6353	6.4721	2.85916	2.3645	3.89859	4.23937	2.25959	1.20898	2.56931	3.88926	5.54846	3.66907	4.36893
16	96.9012	96.6371	97.2224	96.9202	95.2911	95.2911	93.8329	94.805	76.7897	72.4989	67.2667	72.1851	16.5886	19.1725	18.866	18.209	9.89803	13.6559	18.6469	14.067	6.51142	2.81497	2.25339	3.85993	4.39833	2.50421	1.21917	2.70724	4.18974	5.73871	3.72115	4.54987
16.5	98.0162	97.7416	97.7474	97.8351	96.5079	96.5079	95.5515	96.1891	85.0514	85.6495	80.9612	83.8874	18.3878	19.9551	22.4536	20.2655	10.4089	15.0474	19.2133	14.8899	6.83778	2.90421	2.45971	4.06723	4.62918	2.289	1.26925	2.72914	4.00697	5.90589	3.80106	4.57131
17	95.6124	98.9602	99.2468	97.9398	93.8467	93.8467	97.6009	95.0981	91.2392	94.4186	89.2797	91.6458	20.4251	21.8561	23.6618	21.981	9.74959	14.7046	20.2192	14.8911	6.40211	2.78494	2.16079	3.78261	4.49875	2.28874	1.05919	2.61556	4.08447	5.94045	3.90692	4.64395
17.5	97.6472	98.6421	98.8783	98.3892	99.0492	99.0492	97.2548	98.4511	95.0896	95.5714	93.1595	94.6068	25.172	26.5729	29.6924	27.1458	10.2613	14.8841	21.0842	15.4099	6.69937	2.79996	2.19243	3.89725	5.24799	2.15784	0.944187	2.78334	4.1703	4.53768	3.59124	4.09974
18	97.6232	99.1124	97.5868	98.1074	97.2975	97.2975	98.3541	97.6497	96.2451	95.4589	94.128	95.2774	32.9646	36.1123	34.7274	34.6014	12.2547	15.8052	22.3133	16.7911	6.18584	2.71072	2.18718	3.69458	4.84298	2.04828	0.964131	2.61847	3.99997	3.76904	3.76836	3.84579
18.5	94.6855	99.3163	98.4054	97.4691	95.1233	95.1233	98.5999	96.2821	97.8708	95.8063	95.7274	96.4682	41.6934	48.7824	57.3669	49.2809	14.3652	19.2139	29.6977	21.0922	5.85477	2.6782	2.17129	3.56808	5.48032	2.02304	1.09398	2.86578	4.01107	3.66149	3.9765	3.88302
19	97.738	98.3515	97.4361	97.8419	99.0255	99.0255	99.8639	99.305	98.6484	98.1895	97.081	97.973	57.9711	61.1173	76.1786	65.089	21.7828	23.7434	31.9206	25.8156	6.27078	2.74908	2.26913	3.76299	5.21945	2.2255	1.30913	2.91803	4.33086	3.57885	4.22807	4.04593
19.5	97.3368	97.7924	98.655	97.928	94.4664	94.4664	98.8851	95.9393	98.4076	99.8142	97.7267	98.6495	71.3405	72.9628	87.329	77.2108	31.876	33.7207	36.8184	34.1384	5.88387	2.16191	2.08394	3.37657	5.14127	1.95929	1.08423	2.72826	4.13288	2.81198	4.28036	3.74174
20	94.3017	98.4637	99.277	97.3475	95.4966	95.4966	98.2997	96.431	99.8713	95.6325	96.6814	97.3951	80.625	82.527	92.4835	85.2119	41.4164	64.5883	44.8358	50.2802	5.26733	1.93505	1.83008	3.01082	5.3069	2.16617	0.974747	2.81594	3.96122	2.42372	3.99588	3.46027
20.5	97.725	98.5031	99.0994	98.4425	94.7894	93.1093	99.0809	95.6598	99.0293	98.9932	97.86	98.6275	89.6728	90.3003	87.6812	89.2181	54.4336	71.3914	51.401	59.0753	5.6448	1.8066	1.96496	3.13879	6.34146	2.1836	0.834708	3.11992	4.0858	2.77355	4.06357	3.64097
21	96.6429	97.7159	98.6905	97.6831	92.0458	90.3657	98.386	93.5992	99.0172	96.4889	96.9106	97.4722	92.7808	95.1318	91.2081	93.0402	64.2533	77.8147	60.3632	67.477	5.52527	2.20361	2.17653	3.3018	5.07865	2.30565	1.15424	2.84618	4.21594	2.85041	4.7837	3.95002
21.5	95.1239	96.5839	97.1252	96.2776	92.2009	90.5208	98.1058	93.6092	98.9597	98.8341	98.581	98.7916	93.0906	97.6906	94.832	95.2044	68.8996	82.7413	70.8208	74.1539	5.15016	2.63315	2.2665	3.34994	5.05715	1.99754	1.12454	2.72641	4.09135	2.93114	5.33387	4.11879
22	95.5785	96.8004	99.1711	97.1833	94.4261	92.746	99.2675	95.4799	97.8163	98.7346	99.2398	98.5969	98.2329	98.7698	96.1035	97.7021	83.1756	86.4573	80.9557	83.5295	4.82144	1.99176	1.87499	2.89606	5.88495	2.01862	0.924672	2.94274	4.07892	2.57365	5.11181	3.92146
22.5	93.3787	97.4344	99.5348	96.7826	92.454	93.1261	98.088	94.556	97.4773	97.8777	98.004	97.7863	97.4463	99.1433	97.1429	97.9108	87.856	88.6582	89.3094	88.6079	4.63899	2.44799	1.98872	3.02523	5.54257	2.12427	0.959467	2.87543	3.91413	2.70435	6.10797	4.24215
23	93.5504	97.1424	98.5828	96.4252	94.6274	92.5064	98.058	95.0639	98.0882	95.7442	96.3688	96.7338	99.8699	98.5831	95.6578	98.0369	90.0966	91.5233	93.8311	91.817	4.66101	2.37376	2.0469	3.02723	5.84715	2.39048	1.00911	3.08225	4.02906	2.65438	5.95699	4.21348
23.5	92.2969	97.2183	98.4498	95.9884	95.3684	93.4145	97.5629	95.4486	99.4208	96.6372	97.2891	97.7824	98.5753	98.6318	93.1729	96.7933	99.3362	94.8773	98.249	97.4875	4.46598	2.62482	2.21882	3.10321	5.98907	2.53413	0.989168	3.17079	3.604	2.9177	6.59572	4.37247
24	91.8221	96.9013	98.0839	95.6024	94.5503	95.4565	98.204	96.0702	99.2405	96.5759	96.6301	97.4822	97.8453	99.8889	94.5949	97.443	95.8334	99.5305	99.3412	98.235	4.03503	2.90172	2.27962	3.07212	4.99824	2.74935	1.19923	2.98227	3.71615	3.18102	7.0765	4.65789

## Sheet: Figure 1D
Raw data
Time (hours)	Uninfected				Uninfected +Ala				Candida				Candida +Ala				TritonX control
	Replicate 1	Replicate 2	Replicate 3	Replicate 4	Replicate 1	Replicate 2	Replicate 3	Replicate 4	Replicate 1	Replicate 2	Replicate 3	Replicate 4	Replicate 1	Replicate 2	Replicate 3	Replicate 4	Replicate 1	Replicate 2	Replicate 3	Replicate 4
2																	3.67984	2.21629	3.28663	2.5829
3	0.530242	0.663742	0.428183	0.3997	0.545842	0.765942	0.316483	0.35875	0.850592	0.486592	0.355733	0.38855	0.593942	0.792442	0.313483	0.2687
14	0.488692	0.410792	0.333383	0.3606	0.599592	1.35649	0.343033	0.42075	2.89924	2.24549	2.00218	1.6238	1.29244	1.30154	0.805983	0.43805
16	0.602642	0.428142	0.443283	0.00145	0.345942	0.829742	0.383083	0.28185	2.83264	2.34124	1.97923	1.80555	1.40314	1.14104	1.89413	0.5908
Relative measurements to TritonX control
Time (hours)	Uninfected				Uninfected +Ala				Candida				Candida +Ala
	Replicate 1	Replicate 2	Replicate 3	Replicate 4	Replicate 1	Replicate 2	Replicate 3	Replicate 4	Replicate 1	Replicate 2	Replicate 3	Replicate 4	Replicate 1	Replicate 2	Replicate 3	Replicate 4
3	0.144094	0.299483	0.13028	0.154749	0.148333	0.345596	0.0962941	0.138894	0.231149	0.219552	0.108236	0.150432	0.161404	0.357553	0.0953813	0.10403
14	0.132802	0.185351	0.101436	0.139611	0.16294	0.612055	0.104372	0.162898	0.787871	1.01318	0.60919	0.628673	0.351222	0.587261	0.245231	0.169596
16	0.163768	0.193179	0.134875	0.000561384	0.0940099	0.374383	0.116558	0.109122	0.769773	1.05638	0.602207	0.69904	0.381305	0.514843	0.23592	0.228735
Mean
Time (hours)	Uninfected	Uninfected + Ala	Candida	Candida + Ala
3	0.182151	0.182279	0.177342	0.179592
14	0.1398	0.260566	0.759727	0.338327
16	0.123096	0.173518	0.781849	0.340201

## Sheet: Figure 1E
Raw data
Time (hours)	Uninfected				Uninfected +Ala				Candida				Candida +Ala				TritonX control
	Replicate 1	Replicate 2	Replicate 3	Replicate 4	Replicate 1	Replicate 2	Replicate 3	Replicate 4	Replicate 1	Replicate 2	Replicate 3	Replicate 4	Replicate 1	Replicate 2	Replicate 3	Replicate 4	Replicate 1	Replicate 2	Replicate 3	Replicate 4
2																	3.67984	2.21629	3.28663	2.5829
3	0.530242	0.663742	0.428183	0.3997	0.545842	0.765942	0.316483	0.35875	0.850592	0.486592	0.355733	0.38855	0.593942	0.792442	0.313483	0.2687
14	0.488692	0.410792	0.333383	0.3606	0.599592	1.35649	0.343033	0.42075	2.89924	2.24549	2.00218	1.6238	1.29244	1.30154	0.805983	0.43805
16	0.602642	0.428142	0.443283	0.00145	0.345942	0.829742	0.383083	0.28185	2.83264	2.34124	1.97923	1.80555	1.40314	1.14104	1.89413	0.5908
Relative measurements to TritonX control
Time (hours)	Uninfected				Uninfected +Ala				Candida				Candida +Ala
	Replicate 1	Replicate 2	Replicate 3	Replicate 4	Replicate 1	Replicate 2	Replicate 3	Replicate 4	Replicate 1	Replicate 2	Replicate 3	Replicate 4	Replicate 1	Replicate 2	Replicate 3	Replicate 4
3	0.144094	0.299483	0.13028	0.154749	0.148333	0.345596	0.0962941	0.138894	0.231149	0.219552	0.108236	0.150432	0.161404	0.357553	0.0953813	0.10403
14	0.132802	0.185351	0.101436	0.139611	0.16294	0.612055	0.104372	0.162898	0.787871	1.01318	0.60919	0.628673	0.351222	0.587261	0.245231	0.169596
16	0.163768	0.193179	0.134875	0.000561384	0.0940099	0.374383	0.116558	0.109122	0.769773	1.05638	0.602207	0.69904	0.381305	0.514843	0.23592	0.228735
Mean
Time (hours)	Uninfected	Uninfected + Ala	Candida	Candida + Ala
3	0.182151	0.182279	0.177342	0.179592
14	0.1398	0.260566	0.759727	0.338327
16	0.123096	0.173518	0.781849	0.340201

## Sheet: Figure 1F
Time (hours)	Candida 6:1				Candida 1:1				Candida 6:1 + 10mM Ala				Candida 1:1 + 10mM Ala				Uninfected				Uninfected + 10mM Ala
	Replicate 1	Replicate 2	Replicate 3	Mean	Replicate 1	Replicate 2	Replicate 3	Mean	Replicate 1	Replicate 2	Replicate 3	Mean	Replicate 1	Replicate 2	Replicate 3	Mean	Replicate 1	Replicate 2	Replicate 3	Mean	Replicate 1	Replicate 2	Replicate 3	Mean
2.5	10.6695	10.1588	6.87801	9.23542	7.6936	5.66718	5.18044	6.18041	10.7564	6.95847	8.26921	8.66136	9.56057	6.60974	6.20281	7.45771	9.65572	6.43227	6.81389	7.63396	9.7314	6.57561	6.88357	7.73019
3	10.4639	10.3844	7.79132	9.54656	8.11942	6.16008	5.52318	6.60089	10.7203	8.1738	9.21308	9.36906	10.5325	6.98354	6.59022	8.03542	10.184	6.6217	7.24491	8.01688	10.288	6.67763	7.12573	8.03046
3.5	12.2125	11.6399	9.38008	11.0775	9.095	6.72342	6.3253	7.38124	12.6514	10.0869	12.4121	11.7168	11.5055	7.41933	7.34397	8.75626	10.9823	6.69173	7.27666	8.31689	10.4558	6.84905	7.44884	8.25123
4	13.9755	14.317	10.9932	13.0952	9.87117	7.21473	6.95489	8.0136	14.4808	12.9316	14.7578	14.0567	12.7003	7.54365	7.87975	9.37457	11.4217	6.70923	7.26219	8.46436	10.6372	6.91001	7.73687	8.42803
4.5	14.8602	15.6969	12.6063	14.3878	10.2215	7.7726	7.18098	8.3917	15.3765	14.0832	16.3438	15.2678	13.5045	8.2149	8.2867	10.002	11.368	6.46748	7.00816	8.2812	10.8094	6.85749	7.67753	8.44815
5	15.7443	18.4327	13.8471	16.008	11.5437	8.66391	7.88352	9.36372	16.8732	16.3238	17.8772	17.0247	14.8523	8.807	8.95792	10.8724	11.5685	6.53476	7.21971	8.44097	11.0536	7.02652	7.81895	8.63302
5.5	16.5163	19.9097	15.6631	17.363	12.4999	9.32692	8.70388	10.1769	18.0137	17.4614	19.6452	18.3734	15.5682	9.16529	9.58913	11.4409	12.337	6.83218	7.56994	8.91303	11.4401	7.33799	7.95813	8.91206
6	17.4159	21.1098	16.9272	18.4843	13.1797	9.91661	9.1621	10.7528	19.2161	18.8709	21.2486	19.7785	16.508	9.57041	9.89686	11.9917	11.7849	6.64846	7.5335	8.65561	11.0068	7.2269	7.78387	8.67254
6.5	17.7416	21.1413	16.4787	18.4539	13.6219	9.96774	9.02721	10.8723	19.3424	18.7435	20.8413	19.6424	16.6097	9.49292	10.0506	12.051	11.5295	6.4008	7.59794	8.50941	10.7671	7.05246	7.61187	8.47715
7	18.6899	22.9232	18.0088	19.874	13.8259	10.0494	9.44241	11.1059	19.8939	19.8284	21.6362	20.4529	17.3423	9.66324	10.364	12.4565	12.3132	6.31897	7.28697	8.6397	10.7577	6.89792	7.54171	8.3991
7.5	19.3122	23.7273	19.4561	20.8319	14.115	10.6018	9.67738	11.4647	20.7693	20.5441	23.5082	21.6072	17.6674	9.95921	10.935	12.8539	12.1365	6.30737	7.62085	8.68823	10.7162	6.90094	7.60962	8.40893
8	20.2255	25.2316	21.0296	22.1622	14.4489	10.8372	9.90531	11.7305	21.8392	22.4352	25.2495	23.1747	18.3492	10.4412	11.5691	13.4532	12.3681	6.09473	7.70819	8.72366	10.7068	6.80497	7.41671	8.30948
8.5	21.2307	26.2418	23.3838	23.6188	14.7783	11.1095	9.96422	11.9507	22.2188	23.6615	26.1149	23.9984	18.2975	10.4403	11.7858	13.5079	11.8592	6.02175	7.70819	8.52973	10.4996	6.70295	7.24806	8.15021
9	21.493	25.3961	24.2206	23.7032	14.5198	11.2922	9.86698	11.893	21.2234	22.4114	24.201	22.6119	17.871	10.6113	12.0009	13.4944	11.7099	5.93717	7.43501	8.36069	10.1155	6.5605	7.04323	7.90641
9.5	23.8902	28.4352	27.8476	26.7243	14.9023	11.9967	10.2516	12.3835	21.8612	23.9442	25.6692	23.8248	18.5361	11.2324	13.1679	14.3121	10.9957	5.80321	7.37244	8.05711	9.81722	6.61542	7.10776	7.8468
10	27.8104	31.8788	32.8697	30.853	15.1339	12.7938	10.6827	12.8701	22.5718	24.6708	26.9881	24.7436	18.9281	11.8089	14.343	15.0267	10.7385	5.83232	7.24168	7.9375	9.50058	6.74577	6.938	7.72812
10.5	32.9672	37.831	39.8207	36.873	15.6926	13.6449	11.5732	13.6369	23.2244	25.5119	27.2178	25.318	20.1407	12.7426	16.2632	16.3822	11.0749	6.00424	7.40138	8.16019	9.65417	6.84477	7.0421	7.84701
11	40.7152	42.7072	48.5783	44.0002	15.9667	14.7899	12.3353	14.364	23.4872	25.6811	27.954	25.7074	20.5175	13.5037	17.7584	17.2599	10.6612	5.88485	7.3486	7.96487	9.27716	6.71139	6.95891	7.64915
11.5	47.7231	44.3984	54.9834	49.035	17.1685	16.8201	13.9447	15.9778	23.2441	25.5497	27.603	25.4656	20.9786	15.34	19.5695	18.6294	10.9177	5.79161	7.54568	8.08501	9.12121	6.66189	6.72011	7.50107
12	55.2122	48.978	60.3164	54.8355	17.6129	18.8365	15.0262	17.1585	23.226	25.6831	27.6577	25.5223	21.0112	15.7915	20.0696	18.9574	10.5101	5.60218	7.73152	7.94792	8.89069	6.51642	6.9272	7.44477
12.5	61.1073	52.8679	65.431	59.8021	18.4562	19.7494	16.7526	18.3194	22.935	25.5089	27.0876	25.1771	20.9106	16.6507	20.8555	19.4722	9.79464	5.53805	7.58024	7.63765	8.61844	6.40898	6.77048	7.26597
13	68.1566	55.5789	71.8904	65.2086	21.5965	22.242	18.7085	20.849	22.768	25.4243	26.8149	25.0024	21.2174	17.5548	21.8278	20.2	10.5411	5.74204	7.93141	8.07153	8.82529	6.49652	7.03018	7.45066
13.5	73.0439	62.4653	78.1854	71.2315	24.8747	26.3612	22.2436	24.4932	23.5633	26.0105	27.9601	25.8446	21.5563	18.3208	22.2987	20.7253	10.6118	5.78	8.18731	8.19303	8.84659	6.63595	7.11562	7.53272
14	78.673	72.2838	84.8602	78.6056	29.998	32.144	27.615	29.919	24.1125	26.2972	28.373	26.2609	21.6443	18.5253	23.053	21.0742	11.2377	5.81206	8.31994	8.45656	8.96053	6.72587	7.2186	7.635
14.5	88.184	81.4682	90.5732	86.7418	38.2989	41.9762	35.9887	38.7546	25.2569	27.8211	30.5089	27.8623	22.2556	19.2732	23.3047	21.6112	10.3979	5.74794	7.94494	8.03026	8.49533	6.51705	7.06413	7.35884
15	90.9878	83.1875	93.0873	89.0876	45.5197	50.59	45.7218	47.2772	25.376	27.8191	30.3516	27.8489	22.4607	19.522	23.9472	21.9766	10.9366	6.08017	8.21719	8.41133	8.69538	6.81945	7.32271	7.61251
15.5	96.0518	88.7895	94.9383	93.2599	53.4598	59.8423	54.8754	56.0592	26.3989	28.4123	31.4181	28.7431	22.5308	19.3672	24.1041	22.0007	10.6478	5.99264	8.16722	8.26921	8.73739	6.6595	7.18128	7.52606
16	96.0225	90.7381	93.8867	93.5491	58.0744	66.0662	61.3114	61.8173	27.4908	29.2415	32.693	29.8084	22.4442	19.3664	23.7759	21.8621	10.5156	5.96058	8.0654	8.18051	8.79806	6.67096	7.04098	7.50333
16.5	94.0486	92.0435	94.0677	93.3866	63.8817	68.2585	63.4909	65.2104	28.7467	30.0259	35.1727	31.3151	21.9498	18.9446	22.5812	21.1585	10.0396	5.58152	7.86228	7.8278	8.38821	6.33593	6.78128	7.16847
17	94.621	93.455	93.2448	93.7736	67.8567	71.3991	67.1073	68.7877	35.1287	33.5365	40.2242	36.2965	22.1534	19.0231	22.8269	21.3345	9.83242	5.51464	7.81231	7.71979	8.29973	6.32749	6.79882	7.14201
17.5	93.1477	94.3841	93.5942	93.7087	72.4779	76.4856	70.353	73.1055	44.0855	39.6143	46.6934	43.4644	23.058	20.0938	23.2912	22.1477	9.71358	5.68952	7.80856	7.73722	8.1275	6.47297	6.891	7.16382
18	94.4758	95.9762	93.4219	94.6246	76.7592	82.6753	77.7205	79.0517	57.4076	50.6	60.3559	56.1212	25.2365	22.8072	24.4632	24.169	9.99513	5.61083	7.82397	7.80998	8.18816	6.40898	6.88988	7.16234
18.5	94.3082	94.229	94.169	94.2354	80.9025	85.5363	80.5593	82.3327	65.5837	60.2859	70.9297	65.5998	30.3306	29.2879	28.677	29.4318	9.85741	5.7623	8.00002	7.87324	8.34648	6.45848	6.99174	7.26556
19	94.3103	95.4818	95.8869	95.2263	82.5271	90.1916	83.0801	85.2663	74.2272	69.3576	82.6568	75.4139	42.3482	39.0486	37.9097	39.7688	10.2328	5.83232	8.40303	8.15605	8.35565	6.54299	7.27977	7.39281
19.5	96.8011	97.8066	96.5726	97.0601	87.9474	90.2175	86.5883	88.2511	82.5678	77.7045	86.5101	82.2608	53.4528	48.7757	47.6894	49.9726	9.95676	5.92556	8.46091	8.11441	8.19497	6.57801	7.19657	7.32318
20	97.5924	94.9654	96.5793	96.379	88.5471	93.9385	88.4401	90.3086	91.4818	84.015	92.4744	89.3237	66.1327	58.1071	59.1275	61.1224	10.0835	5.89645	8.49454	8.15816	8.45094	6.56352	7.2294	7.41462
20.5	97.6654	94.5751	94.7855	95.6753	90.7323	92.4363	90.2473	91.1386	91.7653	86.8098	93.5823	90.7192	81.7056	68.9463	71.2107	73.9542	9.78185	5.86144	8.36752	8.0036	8.46041	6.51403	7.06413	7.34619
21	97.0081	95.301	97.3469	96.552	93.4339	94.5306	93.4574	93.8073	94.2027	95.9466	92.5885	94.2459	88.4044	76.9147	77.8695	81.0629	9.85131	5.87009	8.44831	8.05657	8.51841	6.42107	7.21411	7.38453
21.5	95.3541	95.7523	98.6519	96.5861	95.1	96.6624	93.9822	95.2482	95.4488	92.2305	96.2542	94.6445	93.4847	86.5504	85.856	88.6304	9.85071	5.82347	8.5062	8.06013	8.46485	6.53393	7.28651	7.42843
22	95.2553	97.455	96.5888	96.433	97.1652	97.1917	95.4025	96.5865	94.8688	94.9168	95.1535	94.9797	94.0153	89.8104	86.171	89.9989	9.76355	5.71292	8.48704	7.98784	8.69035	6.49652	7.26336	7.48341
22.5	96.224	95.5939	96.1569	95.9916	97.3085	97.7023	97.8726	97.6278	95.059	95.3876	95.5506	95.3324	95.7536	92.0601	89.4937	92.4358	9.69469	5.78551	8.67756	8.05259	8.48794	6.42347	7.32677	7.41273
23	97.094	95.2353	97.3126	96.5473	97.9927	97.962	97.8221	97.9256	96.2759	94.5555	94.4497	95.0937	96.4556	93.8814	91.4072	93.9148	9.55696	5.68952	8.48704	7.91117	8.52049	6.48745	7.33014	7.44603
23.5	96.5854	96.6103	96.0077	96.4011	97.6228	97.7781	96.475	97.292	97.8241	95.9479	97.7685	97.1802	96.9217	94.1756	93.9897	95.029	9.75746	5.89645	8.54774	8.06722	8.5273	6.70837	7.39692	7.5442
24	95.2539	98.7461	99.8073	97.9358	97.8261	97.7528	99.1605	98.2465	98.3941	98.8195	97.7095	98.3077	98.3027	98.5338	98.9921	98.6096	9.95736	5.86734	8.53046	8.11838	8.64862	6.63595	7.57973	7.62143

## Sheet: Figure 1G
Time (hours)	P57055			P57055 + Ala			P76067			P76067 + Ala			Uninfected			Uninfected + 10mM Ala
	Replicate 1	Replicate 2	Mean	Replicate 1	Replicate 2	Mean	Replicate 1	Replicate 2	Mean	Replicate 1	Replicate 2	Mean	Replicate 1	Replicate 2	Mean	Replicate 1	Replicate 2	Mean
2.5	5.19968	2.16662	3.68315	1.34585	1.0192	1.18252	2.5331	1.93543	2.23426	1.64071	1.1214	1.38106	4.01043	3.76031	3.88537	2.62029	4.80651	3.7134
3	4.39422	2.73719	3.56571	1.74142	1.35499	1.5482	3.09508	2.19748	2.64628	2.01627	1.43527	1.72577	4.83963	4.57138	4.7055	3.05205	5.73958	4.39581
3.5	5.18097	3.20975	4.19536	1.96695	1.52883	1.74789	3.52017	2.85217	3.18617	2.23688	1.88397	2.06042	5.04776	5.47819	5.26298	3.38085	5.95849	4.66967
4	5.32726	3.60085	4.46405	2.09127	2.00357	2.04742	3.90396	3.21624	3.5601	2.60094	2.19938	2.40016	5.30823	6.60732	5.95777	3.40614	6.34696	4.87655
4.5	5.15082	4.18266	4.66674	2.52133	2.09616	2.30875	4.32685	3.56551	3.94618	2.92626	2.6171	2.77168	5.61498	7.36362	6.4893	3.74759	7.21361	5.4806
5	5.101	4.80166	4.95133	2.75938	2.26988	2.51463	4.67046	3.84194	4.2562	3.08089	2.98444	3.03266	5.92492	7.41609	6.6705	3.71697	7.30587	5.51142
5.5	5.23449	5.17875	5.20662	2.93904	2.62878	2.78391	4.8492	4.20574	4.52747	3.36551	3.1433	3.25441	6.36954	8.06882	7.21918	3.81725	7.62408	5.72066
6	5.62809	5.94992	5.78901	3.1657	2.90671	3.03621	5.17675	4.35142	4.76409	3.75453	3.31264	3.53358	6.28266	8.80484	7.54375	3.86473	7.95083	5.90778
6.5	6.00344	6.67472	6.33908	3.3136	2.91838	3.11599	5.45274	4.56968	5.01121	4.01387	3.57226	3.79306	6.21691	8.77631	7.49661	3.95125	8.50034	6.22579
7	6.7134	7.66875	7.19107	3.43631	3.16148	3.29889	5.61899	4.86086	5.23993	4.52008	3.76872	4.1444	6.76031	9.23891	7.99961	4.04732	8.55885	6.30309
7.5	7.43655	8.57579	8.00617	3.60538	3.04574	3.32556	5.83791	5.23931	5.53861	4.5854	3.97796	4.28168	6.52685	9.1878	7.85733	4.14915	8.41021	6.27968
8	7.84567	9.36853	8.6071	4.01363	3.50918	3.7614	6.15271	5.28302	5.71787	4.98951	4.44915	4.71933	7.06874	9.81429	8.44152	4.41096	8.7139	6.56243
8.5	8.45962	9.83467	9.14715	3.85402	3.4397	3.64686	6.35751	5.29769	5.8276	5.16053	4.59523	4.87788	7.09423	9.4097	8.25197	4.24522	9.07183	6.65853
9	8.85692	10.7598	9.80838	4.06977	3.89159	3.98068	6.95995	5.39956	6.17976	5.32665	4.82695	5.0768	7.00283	9.8631	8.43297	4.37613	8.58192	6.47902
9.5	9.81783	12.2257	11.0218	4.21623	3.75263	3.98443	6.85214	5.53073	6.19143	5.68973	5.04006	5.3649	6.90706	9.59062	8.24884	4.02246	8.58192	6.30219
10	11.1422	13.8638	12.503	4.43263	3.94932	4.19098	7.31851	6.31651	6.81751	6.30033	5.42328	5.86181	6.99394	10.1365	8.56523	4.35127	8.77135	6.56131
10.5	11.6085	14.864	13.2363	4.85065	4.51707	4.68386	8.48514	7.24807	7.8666	7.11351	5.76272	6.43812	7.60627	11.0157	9.31101	4.64524	9.11369	6.87947
11	12.0914	15.8698	13.9806	5.19137	4.89951	5.04544	9.48304	8.20886	8.84595	8.55401	6.60161	7.57781	7.49541	11.9921	9.74374	4.86267	9.43511	7.14889
11.5	12.9711	16.0063	14.4887	5.61053	5.31658	5.46356	10.2346	9.56294	9.89876	10.1045	7.78617	8.94535	7.95646	12.155	10.0557	4.81829	9.4727	7.14549
12	14.3537	16.1335	15.2436	5.49744	5.67551	5.58648	10.7281	10.1743	10.4512	10.807	8.1252	9.46612	7.89357	11.6938	9.79367	4.8041	9.39859	7.10134
12.5	15.7971	16.833	16.3151	5.67903	5.73344	5.70624	11.7761	11.5713	11.6737	11.829	8.8754	10.3522	8.14951	12.4685	10.309	5.10228	9.47804	7.29016
13	16.7331	17.5817	17.1574	5.84794	5.99997	5.92396	13.718	13.2015	13.4598	12.3969	8.89164	10.6443	8.41903	12.972	10.6955	5.19414	9.71146	7.4528
13.5	18.6762	18.1243	18.4002	5.83623	6.05785	5.94704	17.4603	15.9377	16.699	11.0859	8.63475	9.86031	8.11512	12.9766	10.5459	5.40202	10.0747	7.73838
14	20.7336	18.0205	19.3771	5.98348	6.02304	6.00326	22.1404	18.9791	20.5597	9.193	8.89128	9.04214	8.01785	13.3458	10.6818	5.29176	10.0758	7.68378
14.5	23.2697	19.0182	21.144	5.7926	6.06933	5.93096	29.7767	24.7129	27.2448	10.7474	9.16678	9.9571	8.27831	13.1111	10.6947	5.5134	10.5019	8.00763
15	27.3711	20.8048	24.0879	6.4381	6.25469	6.34639	37.0029	30.9131	33.958	10.6541	9.12491	9.88952	8.57634	13.9074	11.2419	5.5773	11.1436	8.36046
15.5	33.9187	25.8529	29.8858	7.61858	6.34757	6.98308	43.9206	40.6069	42.2637	12.8333	9.33106	11.0822	8.54481	13.6703	11.1076	6.11089	10.753	8.43195
16	42.6429	35.3978	39.0203	11.551	7.7145	9.63274	48.5337	49.6431	49.0884	12.8634	9.51628	11.1899	8.21844	13.5428	10.8806	5.58418	10.8903	8.23726
16.5	54.2581	49.652	51.955	17.7136	10.3784	14.046	55.1321	65.6845	60.4083	12.9531	9.81813	11.3856	8.62414	12.99	10.8071	5.43797	10.6714	8.0547
17	66.7256	67.8802	67.3029	25.4265	16.4479	20.9372	65.1667	73.1943	69.1805	13.4987	10.7454	12.122	8.53878	13.6257	11.0822	5.93672	10.8308	8.38374
17.5	76.9945	81.1115	79.053	33.9626	24.0949	29.0287	72.619	80.1345	76.3768	14.4639	14.0336	14.2488	8.11512	13.8273	10.9712	5.95048	10.7658	8.35816
18	85.2983	88.7079	87.0031	43.2358	32.97	38.1029	77.9262	86.9457	82.4359	15.5669	25.967	20.7669	8.18104	13.5313	10.8562	5.74458	10.879	8.3118
18.5	90.02	93.5752	91.7976	52.783	42.6099	47.6965	84.6177	93.1446	88.8812	21.0721	40.7905	30.9313	8.15118	14.4538	11.3025	5.8502	10.922	8.38608
19	93.9346	95.6289	94.7818	62.4001	52.0746	57.2373	89.0601	97.6137	93.3369	34.9536	54.8148	44.8842	8.17802	13.8853	11.0317	5.88082	10.5995	8.24014
19.5	96.4493	97.3432	96.8962	72.4946	62.2572	67.3759	94.2271	98.8646	96.5459	48.5107	66.8209	57.6658	8.08678	14.2352	11.161	6.09825	11.2788	8.68853
20	96.3565	97.4148	96.8857	80.936	71.0713	76.0036	98.064	96.8998	97.4819	59.4412	75.6246	67.5329	8.69458	13.8761	11.2854	5.99641	11.2171	8.60676
20.5	97.7149	98.8892	98.3021	88.9542	80.6716	84.8129	98.9802	96.0262	97.5032	70.6573	84.3329	77.4951	8.49097	14.2807	11.3859	6.02703	11.4687	8.74786
21	96.6554	98.5348	97.5951	95.0973	88.871	91.9841	98.9326	97.1468	98.0397	77.8231	88.6882	83.2556	8.43714	14.5496	11.4933	6.34319	11.7166	9.02991
21.5	92.4506	99.1081	95.7793	98.6852	93.9209	96.303	96.7886	97.3511	97.0698	86.5709	95.4227	90.9968	8.76938	13.9447	11.357	6.61076	11.2632	8.93699
22	94.8327	98.4955	96.6641	98.8197	95.971	97.3954	95.5144	97.4965	96.5055	89.9533	98.624	94.2887	8.9371	13.9231	11.4301	6.61231	11.4307	9.02149
22.5	96.4604	96.0092	96.2348	97.7369	96.2815	97.0092	96.4201	95.7646	96.0924	95.0044	99.8954	97.4499	8.71253	13.8876	11.3001	5.86551	11.4725	8.66902
23	96.5473	95.4368	95.992	97.4118	95.4693	96.4405	96.2879	96.8555	96.5717	97.6526	98.1843	97.9185	8.05239	13.5719	10.8121	5.89191	10.5952	8.24355
23.5	98.7515	95.8768	97.3141	98.3359	96.9404	97.6382	95.5646	97.5533	96.559	99.5273	96.694	98.1107	8.31119	13.4545	10.8828	6.05077	10.7063	8.37851
24	98.2244	95.0269	96.6257	97.5799	96.0593	96.8196	98.6807	94.4396	96.5602	98.6704	95.6506	97.1605	8.67663	12.7847	10.7307	6.06186	10.7282	8.39506

## Sheet: Figire 1H
Time (hours)	Candida			Candida + Ala			Uninfected
	Replicate 1	Replicate 2	Mean	Replicate 1	Replicate 2	Mean	Replicate 1	Replicate 2	Mean
2.5	3.97435	8.65908	6.31672	3.93392	8.22715	6.08053	3.64211	3.51935	3.58073
3	4.55867	9.61927	7.08897	4.20827	10.2383	7.22328	6.17084	3.71416	4.9425
3.5	4.89503	9.87612	7.38557	4.43341	10.6012	7.5173	6.56846	4.20278	5.38562
4	5.44682	10.4548	7.95083	4.42178	10.2628	7.34228	6.21865	3.9739	5.09628
4.5	5.46207	10.7247	8.09337	4.76859	10.009	7.38879	5.58238	3.9739	4.77814
5	5.53422	11.2308	8.3825	4.91352	10.6257	7.7696	5.56644	4.00797	4.78721
5.5	5.99862	11.428	8.71332	4.97435	10.642	7.80818	6.20272	3.84403	5.02337
6	5.68665	11.6719	8.67926	5.32504	11.5696	8.44735	6.37762	4.29857	5.33809
6.5	5.33402	12.0793	8.70669	5.32892	12.3392	8.83408	6.25032	4.03883	5.14458
7	5.4143	12.5334	8.97387	5.60327	12.8031	9.20316	6.10708	4.52745	5.31727
7.5	5.91834	13.7635	9.84091	6.09501	13.327	9.711	6.88638	4.46252	5.67445
8	5.86245	14.0799	9.97119	6.44957	14.1292	10.2894	6.42522	4.72226	5.57374
8.5	5.59824	14.7183	10.1582	6.3124	14.6532	10.4828	6.71148	4.72226	5.71687
9	5.76692	15.9559	10.8614	7.28813	16.4023	11.8452	6.53658	5.47062	6.0036
9.5	5.83907	16.9627	11.4009	7.71515	18.0313	12.8732	6.2822	5.50469	5.89344
10	6.3675	17.2325	11.8	7.58186	18.9263	13.2541	6.26626	5.53877	5.90251
10.5	6.69573	18.2729	12.4843	7.79537	19.6521	13.7237	7.04556	5.92838	6.48697
11	7.06461	19.1811	13.1229	8.3557	21.1994	14.7776	7.44317	6.6118	7.02749
11.5	7.63266	19.7468	13.6897	8.43592	21.6306	15.0332	6.85472	6.58094	6.71783
12	9.57767	19.503	14.5403	8.15381	21.8926	15.0232	6.88659	6.93969	6.91314
12.5	12.8132	22.8062	17.8097	8.5045	22.5256	15.515	7.01389	6.93969	6.97679
13	18.4582	27.5367	22.9975	8.57309	22.9731	15.7731	5.64613	7.13771	6.39192
13.5	26.8998	35.0232	30.9615	8.64168	23.6744	16.158	6.31407	6.94612	6.6301
14	36.3992	43.6097	40.0044	9.202	23.497	16.3495	6.40949	7.62955	7.01952
14.5	48.9919	56.8746	52.9333	8.85907	23.7508	16.3049	5.64613	7.56461	6.60537
15	57.7973	68.2973	63.0473	8.92378	23.8273	16.3755	5.66207	7.72856	6.69532
15.5	70.8473	75.6201	73.2337	9.20976	23.6581	16.4339	6.13917	7.82757	6.98337
16	79.8905	85.9547	82.9226	10.1169	25.1698	17.6433	5.55071	7.8925	6.72161
16.5	86.4114	89.2449	87.8282	10.6772	25.8792	18.2782	5.64613	7.43796	6.54205
17	90.1693	91.614	90.8916	10.883	26.2421	18.5626	5.85291	7.76585	6.80938
17.5	88.4235	93.0153	90.7194	11.0926	27.1891	19.1408	5.07362	7.08242	6.07802
18	87.1349	93.2385	90.1867	11.4511	27.2737	19.3624	3.372	7.3113	5.34165
18.5	94.0552	94.7926	94.4239	14.3213	28.87	21.5956	3.372	7.89572	5.63386
19	85.9338	93.7056	89.8197	13.7532	27.8822	20.8177	3.372	7.44117	5.40658
19.5	86.5181	95.3453	90.9317	17.6329	30.3653	23.9991	3.372	7.63598	5.50399
20	83.7215	94.6604	89.1909	25.5216	35.3969	30.4592	3.59471	7.34538	5.47005
20.5	88.1684	95.2131	91.6907	35.6528	48.5955	42.1241	3.59471	7.79992	5.69732
21	90.3085	96.7672	93.5378	54.85	71.2791	63.0646	3.59471	8.09374	5.84423
21.5	84.7001	95.859	90.2796	64.4698	86.1861	75.328	3.48336	8.09374	5.78855
22	87.8656	96.6686	92.2671	77.8282	93.6333	85.7307	3.59471	7.47525	5.53498
22.5	92.1194	98.6377	95.3786	92.1829	97.4976	94.8402	3.59471	8.28854	5.94163
23	99.7114	99.3877	99.5495	98.9855	99.154	99.0697	3.81743	8.18953	6.00348
23.5	95.6923	99.4343	97.5633	97.8312	98.4282	98.1297	3.59471	7.34538	5.47005
24	91.5493	99.2631	95.4062	98.4186	99.3996	98.9091	3.59471	8.15867	5.87669

## Sheet: Figure 1I
Time (hours)	Candida				Candida + Ala				Uninfected				Uninfected +Ala
	Replicate 1	Replicate 2	Replicate 3	Mean	Replicate 1	Replicate 2	Replicate 3	Mean	Replicate 1	Replicate 2	Replicate 3	Mean	Replicate 1	Replicate 2	Replicate 3	Mean
2.5	1.9878	3.00707	2.02772	2.34086	2.99168	3.28584	3.04651	3.10801	1.12924	1.9797	1.64595	1.58496	2.97857	1.50935	2.16513	2.21769
3	2.59746	3.03648	2.25576	2.6299	3.0856	3.69136	3.36604	3.381	1.22343	1.97013	2.13848	1.77735	2.9741	1.78755	1.98716	2.24961
3.5	2.45154	3.46702	3.02991	2.98282	3.32617	4.32048	3.60543	3.75069	1.31281	2.24612	1.94943	1.83612	3.00779	2.32503	2.3589	2.56391
4	2.66823	3.61895	3.58539	3.29086	3.35994	5.1722	3.81452	4.11556	1.65206	2.37065	2.38002	2.13424	3.56129	2.19413	2.73445	2.82996
4.5	2.69569	3.56994	3.79322	3.35295	4.24422	1.19336	3.61001	3.01586	1.71068	2.95516	3.42882	2.69822	3.20581	2.83054	2.6322	2.88952
5	2.55701	3.37261	4.18408	3.37123	4.47114	2.17781	3.48802	3.37899	1.92788	2.41856	2.71349	2.35331	3.61973	3.08234	2.85428	3.18545
5.5	2.61912	3.72395	4.39492	3.57933	4.91327	3.81232	3.49679	4.07413	2.06435	2.32082	3.7323	2.70582	3.83117	3.30439	3.16991	3.43516
6	2.65091	3.54106	4.62115	3.60437	5.80709	5.38388	3.09575	4.76224	2.44013	2.32656	2.71546	2.49405	4.0921	3.17905	2.76783	3.34633
6.5	2.79536	3.68139	4.61935	3.6987	6.20382	5.35043	3.57832	5.04419	2.22869	2.52969	3.17586	2.64475	3.36327	3.07678	2.81397	3.08467
7	2.65667	3.70152	4.70996	3.68938	5.8155	6.02289	3.58609	5.14149	2.48145	2.91299	2.84256	2.74567	3.45988	4.01668	2.66279	3.37978
7.5	2.9615	3.73608	4.31273	3.6701	6.22488	6.00936	3.61878	5.28434	2.47857	1.86662	3.44721	2.59746	3.30242	3.72543	2.45372	3.16053
8	2.96583	3.77917	4.993	3.91267	6.02016	6.21572	3.54464	5.26017	2.58428	2.43578	3.38205	2.8007	3.54755	3.24157	2.33313	3.04075
8.5	2.72458	3.94555	4.8776	3.84924	6.05285	6.04352	3.33015	5.14218	2.4728	1.83788	3.42703	2.57924	3.29108	3.17905	2.75279	3.07431
9	2.83438	4.39621	5.17062	4.13374	6.19427	6.23565	3.37759	5.26917	2.42571	2.03526	3.15997	2.54031	3.08859	3.32523	2.82901	3.08095
9.5	2.83295	4.41349	4.81057	4.019	6.11515	6.22889	3.95305	5.43236	2.47569	2.18091	3.73159	2.79606	3.10887	3.74961	2.90397	3.25415
10	2.92542	4.54738	4.38312	3.95197	6.13204	6.21537	3.23807	5.19516	2.45935	2.37447	3.46113	2.76498	3.07518	4.11785	2.49783	3.23029
10.5	3.39202	4.61935	4.29311	4.10149	6.1278	6.37299	3.29009	5.26363	2.24503	1.76314	5.20366	3.07061	2.82766	3.69458	2.63448	3.05224
11	3.26633	4.81669	5.38266	4.48856	6.09826	6.28905	3.48483	5.29071	2.24791	2.15409	3.76568	2.72256	3.11781	4.09033	2.738	3.31538
11.5	3.30245	4.86492	4.693	4.28679	5.85661	6.70246	3.66721	5.40876	2.30077	1.64814	4.25715	2.73535	3.58124	3.79129	3.03783	3.47012
12	3.39345	5.20544	4.54835	4.38241	5.74264	7.02516	3.82329	5.53036	1.86637	1.32427	5.63176	2.9408	2.40686	3.56701	2.66482	2.87956
12.5	3.38045	5.53304	4.32873	4.41408	5.54956	6.65407	3.7316	5.31175	2.08357	1.49675	5.78171	3.12068	2.89504	3.02286	2.88969	2.93586
13	3.4339	5.52298	4.87303	4.60997	5.53792	6.55801	3.44756	5.18116	2.19217	1.37027	3.44828	2.33691	2.64305	3.12624	2.70639	2.82523
13.5	3.73873	6.25585	5.10986	5.03481	5.49467	6.28369	3.45633	5.07823	2.24215	1.56766	4.65739	2.8224	2.52375	3.00869	3.12833	2.88693
14	3.71707	6.78672	5.11106	5.20495	5.17914	6.55125	3.72004	5.15014	2.10568	1.81488	4.16503	2.6952	2.49453	4.366	2.75253	3.20435
14.5	4.032	8.00636	4.77182	5.60339	4.78235	7.9182	3.58789	5.42948	1.94422	1.61175	4.76789	2.77462	2.26282	4.26291	2.94707	3.1576
15	4.92769	8.56278	5.63057	6.37368	4.72429	7.61578	2.84319	5.06109	1.9471	1.721	4.27554	2.64788	2.3663	2.75912	2.8716	2.66568
15.5	6.09061	9.79402	6.57837	7.48767	5.15486	7.53254	4.72763	5.80501	2.0557	1.68074	4.84876	2.86174	2.49006	2.41507	2.9616	2.62224
16	7.62338	11.1509	8.92655	9.23361	4.61141	7.98792	4.70628	5.76854	1.52712	1.26871	4.06863	2.28815	1.61719	3.9661	3.09495	2.89275
16.5	9.61269	13.4171	12.316	11.782	4.55126	7.27955	5.45891	5.76324	1.52424	1.68074	4.60436	2.60311	1.8128	3.19544	3.18774	2.73199
17	11.183	16.1928	19.2602	15.5454	4.70532	8.00075	7.05193	6.586	1.66647	1.52744	4.39068	2.5282	2.08955	2.71937	2.97741	2.59544
17.5	14.9811	18.1123	28.6331	20.5755	4.71373	7.72432	6.65287	6.36364	1.69146	1.83982	5.377	2.96943	1.44392	2.50399	3.38202	2.44331
18	18.314	21.2195	38.1314	25.8883	4.66099	6.41892	7.78684	6.28892	1.61362	1.52935	4.3739	2.50562	1.10426	3.20657	3.38304	2.56462
18.5	23.9078	24.6329	49.0775	32.5394	4.74118	7.26323	7.5921	6.53217	1.53865	1.66352	4.84572	2.68263	0.953672	2.78887	3.29151	2.34468
19	29.5377	30.7097	57.3511	39.1995	5.10628	6.53279	9.13967	6.92625	1.32434	1.57726	3.92421	2.27527	1.01212	2.43479	3.38329	2.27673
19.5	35.5519	36.3227	61.9131	44.5959	5.66238	8.16198	15.5318	9.7854	1.23496	1.59261	5.20241	2.67666	0.93339	2.43479	3.65202	2.34007
20	42.8966	44.275	67.6861	51.6192	6.66694	8.4932	19.3216	11.4939	1.29358	2.16369	4.26197	2.57308	0.895227	3.19767	3.2469	2.4466
20.5	49.1463	52.2435	76.6463	59.3454	7.09428	8.74012	23.3174	13.0506	1.18787	2.03338	5.34522	2.85549	0.751182	2.70632	3.66782	2.37511
21	56.1212	59.1709	83.3119	66.2013	9.02536	9.16741	32.8572	17.0166	1.02064	1.79383	5.33505	2.71651	0.447613	2.90085	3.85982	2.40276
21.5	63.6204	66.0629	84.6711	71.4515	13.3834	10.2277	39.4443	21.0185	0.867835	1.96439	5.20062	2.67761	0.393638	2.97005	3.14312	2.16894
22	71.1789	73.5206	86.5859	77.0952	13.619	15.1883	54.1695	27.6589	0.765002	1.71909	4.71113	2.39841	0.319381	2.65351	3.18926	2.05405
22.5	78.4543	80.5607	91.5642	83.5264	18.6532	27.7644	51.7198	32.7125	0.923577	2.21546	5.42645	2.85516	0.605069	2.92503	3.15994	2.23001
23	84.9712	85.3173	93.8927	88.0604	38.397	32.0703	55.2008	41.8894	0.895706	1.75934	3.51147	2.05551	0.456554	2.90197	3.17397	2.1775
23.5	91.4808	90.6269	97.8688	93.3255	42.2453	39.3573	59.8257	47.1428	0.820743	1.7536	5.72707	2.76714	0.402579	3.48224	2.65054	2.17845
24	96.8593	95.3595	96.6814	96.3001	51.2294	41.8064	70.1189	54.3849	0.820743	2.17907	4.92053	2.64011	0.422861	3.33494	2.97969	2.24583

## Sheet: Figuer 2C
Time (hours)	WT				alt1Δ/Δ				alt1Δ/Δ+ALT1				WT + L-alanine				alt1Δ/Δ + L-alanine				alt1Δ/Δ+ALT1 + L-alanine				Uninfected				Uninfected+ Ala
	Replicate 1	Replicate 2	Replicate 3	Mean	Replicate 1	Replicate 2	Replicate 3	Mean	Replicate 1	Replicate 2	Replicate 3	Mean	Replicate 1	Replicate 2	Replicate 3	Mean	Replicate 1	Replicate 2	Replicate 3	Mean	Replicate 1	Replicate 2	Replicate 3	Mean	Replicate 1	Replicate 2	Replicate 3	Mean	Replicate 1	Replicate 2	Replicate 3	Mean
2.5	2.73024	1.31414	3.43837	2.49425	1.46776	3.03751	6.49972	3.66833	3.39608	3.19878	3.92439	3.50642	1.906	3.67376	3.68002	3.08659	2.13002	2.81802	6.8119	3.91998	4.19515	2.87124	6.41301	4.49313	0.913667	2.80289	4.29693	2.67116	2.0163	2.92879	9.23592	4.727
3	2.89158	2.00294	4.38482	3.09311	1.48444	3.43904	6.86397	3.92915	3.46582	3.74652	4.56941	3.92725	2.38358	4.01467	4.13297	3.51041	2.63105	3.42116	7.39803	4.48341	4.57135	3.35062	7.3288	5.08359	0.951427	2.88267	4.46132	2.76514	2.09773	3.27145	9.47796	4.94905
3.5	3.35653	2.92451	4.66488	3.64864	1.78132	3.77721	7.4784	4.34564	4.18001	4.26951	4.96133	4.47028	2.48848	4.57003	4.55227	3.87026	3.20385	4.16621	7.89728	5.08911	5.04797	4.3709	7.57724	5.66537	0.95817	3.06848	4.81889	2.94851	2.20794	3.71107	10.0953	5.33811
4	4.18531	5.95362	4.89203	5.01032	2.12592	4.24945	7.75067	4.70868	4.96051	4.84572	5.17343	4.99322	2.9259	5.23278	4.85303	4.33724	3.90626	4.88846	8.13904	5.64459	5.94432	5.1837	7.98375	6.37059	1.13349	3.35097	4.68911	3.05785	2.32337	4.11838	10.042	5.49458
4.5	5.07481	8.98858	5.39224	6.48521	2.61039	4.63364	8.17154	5.13852	5.70072	5.54548	5.29738	5.51453	3.38903	5.57512	4.90277	4.6223	4.55399	5.48821	8.50607	6.18276	7.05486	6.14745	8.28499	7.16243	1.12674	3.40632	4.8575	3.13019	2.47292	4.55318	10.4216	5.8159
5	6.00244	11.1104	5.69951	7.60411	2.96772	5.33799	8.38237	5.56269	6.79558	5.88921	5.38467	6.02315	3.71818	6.17358	5.09692	4.99622	5.10087	6.45205	8.65843	6.73712	7.83761	7.10803	8.72623	7.89062	1.20901	3.46167	4.8159	3.16219	2.58574	4.80209	10.4525	5.94678
5.5	6.50728	12.577	5.8032	8.29583	3.50336	5.74818	8.76629	6.00595	7.48962	6.57419	5.60287	6.55556	4.03175	6.77453	5.14516	5.31715	5.70245	7.19626	9.18034	7.35968	8.43216	7.93451	8.66988	8.34552	1.29802	3.53067	4.94468	3.25779	2.55681	4.73906	10.6647	5.98686
6	7.27458	13.5172	5.93198	8.90791	3.7185	6.33247	8.68999	6.24698	7.94003	7.24065	5.67619	6.95229	4.57182	7.13735	5.35838	5.68918	6.4567	7.74786	9.15704	7.7872	9.12316	8.53932	8.86552	8.84267	1.36679	3.58135	5.15566	3.36793	2.66963	4.92655	10.476	6.02405
6.5	7.90036	14.3278	6.05969	9.42929	4.04758	7.06683	8.95745	6.69062	8.74655	7.8626	5.85164	7.48693	4.85857	7.5235	5.58917	5.99041	7.23972	8.4946	9.50267	8.41233	9.68719	9.76076	9.19122	9.54639	1.36477	3.63202	5.20025	3.39901	2.60671	5.02191	10.4184	6.01567
7	8.66715	15.2104	6.39798	10.0918	4.36577	7.87856	9.11085	7.11839	9.75348	8.59457	5.78616	8.04474	5.46001	8.12196	5.5454	6.37579	7.99084	9.5049	9.63299	9.04291	10.3522	10.2625	9.22453	9.9464	1.45782	3.54756	5.09426	3.36655	2.75092	5.05423	10.5687	6.12463
7.5	9.07239	15.7908	6.47703	10.4468	4.97738	8.29076	9.37912	7.54908	10.4446	9.41057	6.27058	8.70858	5.95093	9.0168	5.39502	6.78758	8.81972	10.1553	10.0038	9.65962	10.8203	11.0511	9.38047	10.4173	1.62707	3.68413	5.20224	3.50448	2.72734	5.05423	10.5645	6.11535
8	9.33561	16.3407	6.48829	10.7215	5.80412	9.11316	9.31244	8.07658	10.8262	10.0276	6.18242	9.01207	6.44635	9.82971	5.66245	7.31283	9.67452	11.1699	10.3054	10.3833	11.4021	11.618	9.39926	10.8065	1.61359	3.53678	5.43103	3.52713	2.88731	5.02351	10.3534	6.08806
8.5	9.55539	16.8839	6.74265	11.0607	6.22352	9.63741	9.84575	8.56889	11.539	10.4801	6.30637	9.44179	7.15381	10.2805	5.73241	7.72224	10.063	11.795	10.1108	10.6563	11.8523	11.9975	9.84618	11.232	1.62235	3.52599	5.47163	3.53999	2.91363	4.92816	10.5165	6.11943
9	9.9398	17.2816	6.72076	11.314	6.87658	10.1657	10.1377	9.05998	12.7031	11.0278	6.50189	10.0776	7.56778	10.7076	5.70473	7.99338	10.6301	12.3288	10.8254	11.2615	12.4734	12.3719	9.51053	11.452	1.54481	3.55978	5.30324	3.46928	2.96079	4.90066	10.5997	6.15371
9.5	10.2228	17.6767	6.8287	11.5761	7.59865	10.3291	10.3305	9.4194	12.9934	11.6955	6.5045	10.3978	8.23171	11.1574	5.72644	8.37184	11.3326	12.785	10.7643	11.6273	13.4355	12.5663	9.81248	11.9381	1.62235	3.62267	5.42903	3.55802	3.14708	4.77621	10.7905	6.23794
10	10.8903	17.9372	7.02164	11.9497	7.85871	10.7239	10.4445	9.67573	13.4173	11.9712	6.55687	10.6485	8.8476	11.2655	5.66958	8.59422	11.2434	13.0173	10.8506	11.7038	13.2829	12.932	9.73806	11.9843	1.67764	3.62877	5.21606	3.50749	3.01069	4.83763	10.8076	6.21863
10.5	11.6184	17.7968	7.05904	12.1581	8.06181	11.2082	10.4658	9.91193	13.3554	12.2272	6.75152	10.778	8.91122	11.6064	5.71484	8.74415	11.4536	13.4523	11.2208	12.0422	14.0263	13.2171	10.4596	12.5677	1.71338	3.53821	5.44983	3.56714	3.23098	4.64853	11.152	6.34383
11	11.4569	17.8026	6.81	12.0232	7.94556	11.3469	10.4903	9.92759	13.5995	12.3002	6.91126	10.937	8.99941	11.8208	6.00996	8.9434	11.6003	13.3805	11.3467	12.1092	13.6983	13.3699	10.5542	12.5408	1.76867	3.69634	5.53103	3.66535	3.13392	4.67924	11.12	6.31105
11.5	11.6388	17.7103	6.88055	12.0765	7.88743	11.625	10.6003	10.0376	13.1073	12.5969	6.98631	10.8968	8.71041	11.9268	6.2434	8.96021	11.361	13.6466	11.1339	12.0472	13.8905	13.6704	10.8597	12.8069	1.98377	3.53821	5.53203	3.68467	3.25716	4.7746	11.2479	6.42657
12	11.0724	17.9489	7.09751	12.0396	8.38278	11.9085	10.8104	10.3672	13.4005	12.6266	7.58598	11.2044	9.00053	12.0766	6.26097	9.1127	11.4445	13.601	11.6545	12.2333	13.5802	13.6859	10.7658	12.6773	1.82869	3.57667	5.9292	3.77818	3.36997	4.8037	11.2831	6.4856
12.5	11.092	18.2602	7.8761	12.4094	8.5692	13.0011	12.1738	11.248	13.3789	13.1534	11.2127	12.5816	8.96037	12.3529	6.44501	9.25274	11.4357	14.1788	11.5211	12.3785	13.2652	13.9263	10.9037	12.6984	2.1038	3.57667	5.9708	3.88375	3.49856	4.92977	11.0933	6.50722
13	10.9314	19.6024	10.4107	13.6482	8.65605	16.6342	18.8654	14.7186	13.6845	15.065	20.4544	16.4013	8.71716	12.3525	6.41583	9.16183	11.6086	14.3967	11.7005	12.5686	13.5408	14.0225	10.9608	12.8414	2.04581	3.52599	5.80441	3.79207	3.80274	4.92816	11.1904	6.64042
13.5	11.3778	25.1332	20.0599	18.857	9.78153	26.1629	33.0037	22.9827	16.194	23.3509	32.223	23.9227	8.87443	12.6938	6.46109	9.34309	11.7379	14.2996	11.9794	12.6723	13.6983	14.1977	10.9941	12.9633	2.13279	3.59356	6.01738	3.91458	3.68471	5.02351	11.4111	6.70644
14	15.8226	36.8946	34.7337	29.1503	15.481	38.9486	50.3611	34.9302	25.3464	36.0555	45.8394	35.7471	8.81531	12.8005	6.54714	9.38763	11.6803	14.5944	12.286	12.8536	13.5191	14.4038	11.1153	13.0127	2.11931	3.59967	7.01871	4.24589	3.93118	5.05423	11.667	6.88413
14.5	24.8724	50.0821	50.13	41.6948	24.0458	52.0456	65.8463	47.3126	39.1248	50.1509	57.3227	48.8661	8.29757	12.6309	6.84673	9.2584	10.9663	14.0132	12.3729	12.4508	13.8861	14.6323	11.6483	13.3889	1.90421	3.62124	6.68493	4.07012	3.70034	5.05423	12.1735	6.97601
15	36.4639	63.9185	63.144	54.5088	36.0426	63.4338	76.4097	58.6287	53.7661	62.918	66.484	61.056	8.06319	13.187	7.79011	9.68009	10.6438	14.3748	11.4814	12.1667	13.6322	14.3573	10.869	12.9528	1.82666	3.74702	6.66413	4.07927	3.5771	5.11565	12.0978	6.93017
15.5	47.448	74.7752	73.496	65.2397	47.634	72.2827	85.3751	68.4306	65.6788	73.0949	73.8639	70.8792	8.79748	15.6364	16.6785	13.7041	10.1288	14.1839	11.9146	12.0758	13.3046	14.3455	10.7591	12.803	1.97973	3.71323	6.32437	4.00578	3.627	5.08816	12.3888	7.03467
16	57.9892	81.5986	81.1397	73.5758	56.4361	78.8492	90.576	75.2871	75.0271	80.1239	78.6121	77.9211	9.9067	24.4298	37.2326	23.8564	9.72294	13.8443	11.7137	11.7603	12.9504	14.2802	11.1511	12.7939	1.68034	3.71791	6.68593	4.02806	3.73187	5.14636	12.2172	7.0318
16.5	64.1278	86.4588	86.8825	79.1564	63.5742	84.8027	93.8478	80.7416	81.497	85.9684	83.3394	83.6016	15.4136	42.4079	59.8514	39.2243	8.24919	13.9676	11.5034	11.2401	12.9412	15.5109	13.1635	13.8719	1.58729	3.57056	6.01838	3.72541	3.37258	4.98959	11.5209	6.62769
17	69.9423	91.8337	91.7627	84.5129	70.3111	88.904	96.8584	85.3578	86.5484	90.3687	87.543	88.1534	31.4033	64.5664	76.1682	57.3793	8.46225	15.179	11.601	11.7474	13.6454	19.054	17.8907	16.8634	1.73429	3.64424	6.24916	3.87589	3.17847	5.08494	12.4645	6.90932
17.5	73.8425	94.8146	93.9431	87.5334	74.5006	93.2481	98.078	88.6089	91.5099	94.408	91.2718	92.3965	49.7283	79.0525	84.3734	71.0514	9.82377	16.2932	11.8875	12.6681	16.152	27.9372	26.4512	23.5135	1.40995	3.70713	6.70872	3.94193	3.51144	5.08494	12.1468	6.91439
18	77.5367	96.1234	96.5542	90.0714	78.0165	95.171	98.1897	90.4591	92.2982	95.3007	94.812	94.137	64.7701	85.0157	90.0346	79.9401	11.0876	18.4346	12.6001	14.0408	20.6537	37.5563	40.1577	32.7892	1.23261	3.66866	6.78494	3.8954	3.19945	5.12048	12.1383	6.8194
18.5	79.8168	97.7609	97.0149	91.5308	80.6262	96.7278	98.6443	91.9994	94.1996	96.5841	95.402	95.3952	77.3591	93.0917	92.9306	87.7938	13.0681	23.1684	11.6035	15.9467	30.9131	51.6246	53.9326	45.4901	1.27509	3.80523	5.9074	3.66258	3.21507	5.24976	11.2224	6.5624
19	82.5849	98.7431	98.7469	93.3583	82.2729	98.2605	99.3675	93.3003	95.6251	97.7302	97.6033	96.9862	84.0872	95.8211	95.4446	91.7843	16.4069	28.9979	12.5944	19.3331	42.5707	65.8638	69.4864	59.307	1.22385	3.75312	5.38045	3.45247	2.93187	5.1544	10.702	6.26276
19.5	87.0354	99.1506	98.9836	95.0566	87.0919	98.598	99.698	95.1293	96.4615	97.5164	97.9995	97.3258	90.438	98.0924	97.214	95.2481	20.2671	35.8538	13.5936	23.2381	51.0203	78.9565	80.1953	70.0574	1.39242	3.84044	5.47262	3.5685	2.61192	5.06066	10.8886	6.18707
20	90.7332	99.12	99.564	96.4724	91.0443	99.245	99.4241	96.5711	97.2022	97.7266	98.7537	97.8941	94.5184	98.1816	99.198	97.2994	24.931	44.4843	16.5374	28.6509	62.0779	88.4814	87.0132	79.1908	1.29735	3.98168	5.16648	3.48184	2.44674	4.93138	10.7116	6.02991
20.5	94.5082	99.3874	99.5901	97.8286	94.2371	99.217	98.2872	97.2471	97.6217	99.1395	98.875	98.5454	97.5443	99.0309	99.9518	98.8423	31.9631	53.2045	17.5498	34.2391	71.2262	94.8989	93.7742	86.6331	1.38838	3.84044	4.5911	3.27331	2.48087	4.77621	9.38946	5.54885
21	95.619	98.9566	98.5742	97.7166	95.2561	99.0275	97.6792	97.3209	98.4719	98.7265	99.2049	98.8011	98.476	97.9989	99.6498	98.7082	39.7696	61.0284	21.6879	40.8286	80.3835	97.7099	95.3506	91.148	1.44434	3.77755	5.17646	3.46612	2.34448	4.59032	10.4483	5.79435
21.5	97.0934	98.3575	98.7478	98.0662	96.8899	97.354	97.2471	97.1637	98.5363	97.7905	97.2757	97.8675	99.6988	97.8495	99.5316	99.0266	48.3586	67.9948	28.7649	48.3728	86.8779	97.8658	99.6619	94.8019	1.99255	3.78509	4.65549	3.47771	2.64619	5.09941	9.54407	5.76322
22	98.9329	98.6899	98.7746	98.7991	98.3236	99.3764	97.1515	98.2838	99.5103	99.1036	96.5957	98.4032	99.7031	98.213	99.0817	98.9993	56.096	76.8958	35.1109	56.0342	90.7137	99.7318	95.1671	95.2042	1.47536	4.30224	4.54751	3.4417	2.32104	5.21905	8.63562	5.3919
22.5	99.5152	99.0267	97.9505	98.8308	98.4778	99.2496	95.5905	97.7727	99.3762	99.5833	95.1101	98.0232	99.7981	98.172	98.6028	98.8576	65.3011	82.8595	41.4551	63.2052	95.2292	99.7665	95.5899	96.8619	1.61966	4.53977	4.23653	3.46532	2.38396	5.21905	8.84354	5.48218
23	99.3935	98.59	96.5391	98.1742	99.1658	98.8334	93.7894	97.2629	99.1954	98.7449	94.3106	97.417	99.1743	96.6493	98.2505	98.0247	71.4872	87.0781	50.7584	69.7745	97.1726	97.3862	96.1342	96.8976	1.88601	4.16711	3.86998	3.3077	2.21343	5.06548	7.77195	5.01695
23.5	99.6354	98.2415	96.6192	98.1654	99.1399	98.7054	94.4741	97.4398	99.0392	98.8241	90.4633	96.1089	98.9478	97.5725	97.3565	97.9589	79.0251	91.0492	58.3849	76.1531	98.2763	97.1937	96.9769	97.4823	1.70395	4.52431	3.96016	3.39614	2.36024	4.97174	6.9424	4.75813
24	99.034	98.2456	95.8727	97.7174	99.1508	98.1204	93.887	97.0527	99.2829	98.5001	90.4266	96.0699	99.2212	97.2726	97.9027	98.1321	82.9949	94.1612	65.5085	80.8882	99.2297	96.3864	94.8331	96.8164	1.77947	5.04575	3.68479	3.50334	1.9013	4.81335	6.27172	4.32879

## Sheet: Figure 3A
Time (hours)	Candida				Candida + L-Ala				Candida + D-Ala				Uninfected				Uninfected + L-Ala				Uninfected + D-Ala
	Replicate 1	Replicate 2	Replicate 3	Mean	Replicate 1	Replicate 2	Replicate 3	Mean	Replicate 1	Replicate 2	Replicate 3	Mean	Replicate 1	Replicate 2	Replicate 3	Mean	Replicate 1	Replicate 2	Replicate 3	Mean	Replicate 1	Replicate 2	Replicate 3	Mean
2.5	4.11351	2.69423	14.4948	7.10084	5.09474	1.53362	7.50575	4.71137	4.30631	3.02987	9.61473	5.6503	1.12924	1.9797	8.14653	3.75182	2.97857	1.50935	7.18178	3.8899	2.20605	2.08759	7.2067	3.83345
3	5.77806	3.0669	9.00187	5.94894	6.2343	1.7689	10.8461	6.28309	5.44589	3.64316	14.6867	7.92526	1.22343	1.97013	8.89889	4.03082	2.9741	1.78755	6.57454	3.77873	2.38257	2.30909	6.96809	3.88658
3.5	7.12537	3.41163	14.8816	8.47287	6.60362	1.93666	16.8861	8.47546	6.08348	3.97711	12.3867	7.48243	1.31281	2.24612	7.43901	3.66598	3.00779	2.32503	7.91581	4.41621	2.92663	2.80122	6.9619	4.22992
4	9.05534	3.97914	11.8757	8.30339	8.04776	2.24801	14.0787	8.12483	6.63476	4.56504	10.2327	7.14417	1.65206	2.37065	8.24527	4.08933	3.56129	2.19413	7.81311	4.52284	3.1945	3.11792	7.3131	4.54184
4.5	9.94416	4.57156	14.2045	9.57342	8.6903	2.65106	18.0913	9.81089	7.57178	4.99259	13.7494	8.77125	1.71068	2.95516	8.68238	4.44941	3.20581	2.83054	11.1348	5.72371	3.54754	3.93092	8.48376	5.32074
5	10.2685	5.10741	11.0849	8.82028	10.046	2.92815	12.3896	8.45459	8.10191	5.53761	11.3529	8.33082	1.92788	2.41856	8.01356	4.12	3.61973	3.08234	8.45442	5.05216	3.82236	3.85709	8.5539	5.41111
5.5	10.9013	5.62591	13.309	9.9454	10.3529	3.19031	13.0038	8.84899	8.35905	6.15626	11.0844	8.53324	2.06435	2.32082	11.5367	5.30728	3.83117	3.30439	10.1936	5.7764	4.05011	3.09461	9.92138	5.6887
6	11.7108	5.98629	14.2802	10.6591	11.0635	3.39183	13.171	9.20876	8.53693	6.22696	11.941	8.90165	2.44013	2.32656	8.36883	4.37851	4.0921	3.17905	9.39628	5.55581	4.29236	3.16816	8.44964	5.30339
6.5	12.2675	6.03092	14.4913	10.9299	11.4218	3.62123	14.9015	9.98151	8.77294	6.67352	12.3522	9.26621	2.22869	2.52969	9.41622	4.72487	3.36327	3.07678	9.27806	5.23937	4.1899	2.33157	9.27332	5.26493
7	12.5886	6.61207	15.6309	11.6105	11.8681	4.12992	15.978	10.6587	9.2168	7.25756	14.5468	10.3404	2.48145	2.91299	10.2038	5.1994	3.45988	4.01668	9.64044	5.70567	4.28958	3.7802	9.20366	5.75781
7.5	13.1838	6.78888	16.4925	12.155	12.2861	4.51365	16.4775	11.0924	9.63597	7.86255	15.8688	11.1225	2.47857	1.86662	10.2621	4.8691	3.30242	3.72543	10.0275	5.68513	4.21551	3.01855	9.1167	5.45025
8	13.406	6.96333	15.7858	12.0517	12.2688	4.71029	16.3401	11.1064	9.56728	8.07999	15.9117	11.1863	2.58428	2.43578	8.44534	4.48847	3.54755	3.24157	9.92246	5.57053	4.51594	2.87089	8.72819	5.37167
8.5	13.5316	7.69402	14.533	11.9195	12.3116	5.07102	15.2643	10.8823	9.81915	8.60649	16.2782	11.568	2.4728	1.83788	8.22836	4.17968	3.29108	3.17905	8.87319	5.11444	4.19268	2.70185	8.45226	5.1156
9	13.7248	7.60646	14.8868	12.0727	12.3175	5.42418	14.355	10.6989	9.8667	8.91313	15.4708	11.4169	2.42571	2.03526	7.81472	4.0919	3.08859	3.32523	8.71325	5.04236	4.08744	2.70018	8.45151	5.07971
9.5	13.6863	8.2319	14.5383	12.1522	12.7898	6.02994	15.7821	11.5339	9.97767	9.63758	16.2214	11.9455	2.47569	2.18091	7.89066	4.18242	3.10887	3.74961	8.59196	5.15015	4.59695	2.94472	8.20158	5.24775
10	14.4024	8.54394	17.0214	13.3226	12.4005	6.66827	15.7676	11.6121	10.2665	10.3669	16.187	12.2735	2.45935	2.37447	8.053	4.29561	3.07518	4.11785	8.69857	5.2972	4.38648	2.52476	8.5539	5.15504
10.5	15.0808	10.8014	17.2325	14.3716	12.3835	7.6485	16.1317	12.0546	10.2119	10.6662	16.5958	12.4913	2.24503	1.76314	8.13968	4.04928	2.82766	3.69458	8.89715	5.13979	3.96493	2.23054	8.55352	4.91633
11	14.8688	14.2905	19.557	16.2388	12.4768	7.83658	17.7527	12.6887	10.8213	10.5092	18.1774	13.1693	2.24791	2.15409	8.47252	4.29151	3.11781	4.09033	9.06713	5.42509	4.14562	2.86978	8.76774	5.26105
11.5	14.8099	20.5368	24.5166	19.9544	12.4857	8.02417	16.2994	12.2697	11.0362	10.6691	16.8475	12.8509	2.30077	1.64814	8.48726	4.14539	3.58124	3.79129	8.84306	5.4052	4.36086	2.84563	8.78541	5.33063
12	14.992	27.9403	32.4246	25.119	13.0824	8.1313	17.5278	12.9138	10.994	10.8588	17.8244	13.2257	1.86637	1.32428	10.4349	4.54185	2.40686	3.56701	9.18612	5.05333	3.34263	1.69178	9.05088	4.69509
12.5	14.6151	36.5622	40.7099	30.6291	11.952	8.25257	19.4406	13.215	11.0609	10.8622	19.2917	13.7383	2.08357	1.49675	8.73684	4.10572	2.89504	3.02286	9.10037	5.00609	3.57038	1.84055	8.4963	4.63574
13	15.6547	45.8342	52.7155	38.0681	11.8518	8.2	19.8731	13.3083	10.7438	11.2113	19.6317	13.8623	2.19217	1.37027	10.6409	4.73444	2.64305	3.12624	9.74399	5.17109	3.61327	2.03541	8.90248	4.85039
13.5	18.453	54.3791	63.6883	45.5068	11.8123	8.46853	20.654	13.6449	10.8231	11.4687	20.4042	14.232	2.24215	1.56766	9.13204	4.31395	2.52375	3.00869	9.36926	4.96723	3.41947	1.64237	10.1557	5.07252
14	24.2247	64.4775	68.8278	52.51	11.8893	8.43627	18.1477	12.8244	10.9323	12.5904	19.4797	14.3341	2.10568	1.81488	10.4318	4.78411	2.49453	4.366	10.179	5.67984	3.67145	1.74146	8.88817	4.76703
14.5	32.5225	69.3048	81.948	61.2584	11.2322	8.67424	20.5562	13.4875	11.119	15.3711	19.8819	15.4574	1.94422	1.61175	10.4474	4.66777	2.26282	4.26291	10.2964	5.60738	3.09621	2.10813	9.97507	5.0598
15	44.1558	77.4066	85.2216	68.928	11.2551	8.94446	21.7964	13.9987	12.0982	21.9461	23.1305	19.0583	1.9471	1.721	10.825	4.83102	2.3663	2.75912	10.7585	5.29463	2.99514	1.19993	11.0814	5.09216
15.5	55.1225	82.0479	81.1668	72.7791	11.039	10.6727	20.7253	14.1457	13.6253	33.5279	27.0892	24.7475	2.0557	1.68074	9.32916	4.3552	2.49006	2.41507	10.4888	5.13131	3.39386	1.37174	9.27661	4.68074
16	68.0868	85.1744	86.0624	79.7746	11.3856	16.0956	23.5892	17.0235	18.1729	45.08	33.5836	32.2788	1.52712	1.26871	9.25303	4.01629	1.61719	3.9661	10.1349	5.23941	2.42129	1.69094	8.58112	4.23112
16.5	77.5335	89.4007	87.0339	84.656	11.1328	28.2388	25.2269	21.5328	24.5682	58.2803	39.9111	40.9199	1.52424	1.68074	10.176	4.46033	1.8128	3.19544	10.7322	5.24681	2.64348	1.24961	9.2391	4.3774
17	84.0279	89.9414	85.1064	86.3586	13.1386	40.6197	33.5006	29.0863	32.3812	71.4182	46.3391	50.0461	1.66647	1.52744	9.51393	4.23595	2.08955	2.71937	10.8126	5.20716	2.69054	0.955112	7.60616	3.7506
17.5	89.9978	91.0426	89.8177	90.286	22.1974	54.2066	49.5748	41.9929	41.1331	81.9372	59.2995	60.7899	1.69146	1.83982	10.0247	4.51866	1.44392	2.50399	11.4809	5.14293	2.6407	1.24989	7.55304	3.81454
18	90.3355	90.294	91.1249	90.5848	34.7381	66.2001	61.2654	54.0679	50.5596	87.5134	65.6209	67.898	1.61362	1.52935	11.1182	4.75372	1.10426	3.20657	11.8827	5.39783	2.27316	1.29874	9.30529	4.2924
18.5	91.939	89.4755	96.0905	92.5016	50.9155	77.7997	77.5846	68.7666	59.8259	92.2544	77.5875	76.556	1.53865	1.66352	11.7584	4.98686	0.953672	2.78887	10.8736	4.87205	2.29044	1.22435	9.62125	4.37868
19	96.1408	93.4127	95.8045	95.1194	70.2933	88.9417	85.8777	81.7042	67.3505	96.055	83.9294	82.445	1.32434	1.57726	13.2697	5.39043	1.01212	2.43479	11.1224	4.85645	2.12225	1.44502	9.09923	4.22217
19.5	96.8277	89.3397	93.3721	93.1798	83.0055	90.7926	88.529	87.4424	74.445	96.7356	84.4672	85.216	1.23496	1.59261	11.917	4.91486	0.93339	2.43479	10.7631	4.71044	2.16653	1.44641	9.32494	4.31262
20	98.2294	95.2199	91.414	94.9544	90.4105	96.8275	92.3204	93.1861	82.281	99.0016	87.2777	89.5201	1.29358	2.16369	10.6541	4.70378	0.895227	3.19767	9.17758	4.42349	2.14092	1.73924	7.57904	3.81973
20.5	99.2572	93.1612	98.3074	96.9086	95.3286	96.2026	95.0861	95.5391	86.7743	98.6978	92.0446	92.5056	1.18787	2.03338	10.6175	4.61291	0.751182	2.70632	9.4743	4.3106	1.72632	1.59296	6.69627	3.33852
21	99.3051	97.8667	96.5695	97.9138	95.6893	99.244	95.7721	96.9018	90.0063	99.5071	94.5679	94.6938	1.02064	1.79383	10.5001	4.43819	0.447613	2.90085	7.76751	3.70533	1.58236	1.56909	6.57686	3.24277
21.5	99.6349	91.4205	98.7213	96.5922	96.107	96.157	97.0559	96.44	92.3243	98.3932	96.2549	95.6574	0.867835	1.96439	10.151	4.32774	0.393638	2.97005	6.58303	3.31557	1.53113	1.49581	6.41538	3.14744
22	98.0402	95.14	94.5784	95.9195	97.5766	95.249	98.4679	97.0978	93.3636	98.7744	96.7943	96.3107	0.765002	1.71909	9.96073	4.14827	0.319381	2.65351	7.50712	3.49333	1.23626	1.51996	6.49065	3.08229
22.5	98.6448	98.2235	97.0181	97.9621	97.5481	97.7688	96.8338	97.3836	94.9629	98.927	96.9296	96.9398	0.923577	2.21546	9.83099	4.32334	0.605069	2.92503	6.45477	3.32829	1.36016	1.76478	6.81099	3.31198
23	96.9889	96.1488	98.2979	97.1452	97.3694	98.4335	97.2402	97.6811	95.6198	98.4195	97.5892	97.2095	0.895706	1.75934	9.90294	4.186	0.456554	2.90197	7.32401	3.56084	1.2861	1.71537	6.65325	3.21824
23.5	98.8482	98.4593	96.8979	98.0685	98.3535	98.1078	95.9261	97.4625	95.4719	98.928	97.13	97.1766	0.820743	1.7536	8.35078	3.64171	0.402579	3.48224	7.27999	3.7216	1.11236	1.76395	6.66644	3.18091
24	97.5692	95.5577	95.7515	96.2928	98.0097	97.3861	95.3548	96.9168	95.8049	98.3425	96.2862	96.8112	0.820743	2.17907	9.02331	4.00771	0.422861	3.33494	6.29019	3.34933	1.06669	1.98517	6.50608	3.18598

## Sheet: Figure 3C
Time (hours)	WT			alt1Δ/Δ			alt1Δ/Δ+ALT1			WT + D-alanine			alt1Δ/Δ + D-alanine			alt1Δ/Δ+ALT1 + D-alanine			Uninfected			Uninfected+ D-Ala
	Replicate 1	Replicate 2	Mean	Replicate 1	Replicate 2	Mean	Replicate 1	Replicate 2	Mean	Replicate 1	Replicate 2	Mean	Replicate 1	Replicate 2	Mean	Replicate 1	Replicate 2	Mean	Replicate 1	Replicate 2	Mean	Replicate 1	Replicate 2	Mean
2.5	4.11	2.89	3.5	4.63	5.34	4.985	5.8	5.28	5.54	3.53	5.51	4.52	4.49	5.1	4.795	5.34	4.87	5.105	6.11	6.83	6.47	7.65	4.2	5.925
3	4.65	3.35	4	4.9	5.65	5.275	5.88	5.76	5.82	3.69	6.62	5.155	4.97	5.3	5.135	5.73	5.02	5.375	6.09	6.9	6.495	8.36	4.72	6.54
3.5	5.64	4.07	4.855	5.49	6.22	5.855	6.79	6.58	6.685	4.07	6.96	5.515	5.29	5.58	5.435	6.68	6.04	6.36	6.35	6.88	6.615	7.99	5.06	6.525
4	6.6	5.58	6.09	6.27	7.14	6.705	7.55	7.41	7.48	4.77	7.53	6.15	6.35	6.42	6.385	7.56	6.74	7.15	6.05	7.01	6.53	8.02	4.72	6.37
4.5	7.19	7.9	7.545	6.89	8.22	7.555	9.26	8.13	8.695	5.78	7.38	6.58	6.75	6.93	6.84	8.92	7.18	8.05	6.23	6.62	6.425	7.89	4.68	6.285
5	7.78	10.58	9.18	8.08	9.02	8.55	10.49	8.42	9.455	5.93	7.69	6.81	7.78	7.52	7.65	9.88	8.25	9.065	5.51	6.31	5.91	7.27	4.61	5.94
5.5	7.77	13.63	10.7	8.67	9.59	9.13	11.28	8.66	9.97	6.6	7.88	7.24	8.05	7.78	7.915	10.55	8.56	9.555	5.09	6.07	5.58	6.84	4.74	5.79
6	8.16	16.31	12.235	9.73	9.66	9.695	12.08	8.78	10.43	7.18	8.17	7.675	8.7	7.85	8.275	11.25	8.78	10.015	5.07	5.77	5.42	6.38	4.61	5.495
6.5	8.73	17.95	13.34	10.34	10.61	10.475	12.65	9.16	10.905	7.9	7.85	7.875	9.08	8.21	8.645	11.51	9.48	10.495	5.17	5.87	5.52	6.33	4.69	5.51
7	8.62	19.5	14.06	11.23	10.48	10.855	13.52	9.81	11.665	8.5	7.85	8.175	9.81	8.52	9.165	12.76	9.98	11.37	5.4	5.94	5.67	6.98	4.56	5.77
7.5	9.43	20.44	14.935	11.77	10.92	11.345	13.57	10.02	11.795	8.31	8.71	8.51	9.79	9.33	9.56	12.51	10.34	11.425	5.55	5.94	5.745	6.76	4.8	5.78
8	10.59	21.82	16.205	12.37	11.76	12.065	14.35	11.15	12.75	9.25	9.43	9.34	10.46	10.48	10.47	13.63	11.29	12.46	5.74	6.02	5.88	6.78	4.61	5.695
8.5	12.23	22.92	17.575	13.16	12.79	12.975	15.28	12.54	13.91	9.92	9.43	9.675	11.15	10.9	11.025	14.29	11.76	13.025	5.5	6.08	5.79	7.03	4.66	5.845
9	14.2	24.08	19.14	14.68	13.99	14.335	16.78	14.58	15.68	10.4	9.34	9.87	11.38	11.42	11.4	15.16	12.24	13.7	5.76	6.18	5.97	6.47	4.53	5.5
9.5	14.83	28.12	21.475	18.19	15.51	16.85	19.37	20.17	19.77	10.63	9.18	9.905	12.05	11.58	11.815	14.89	12.43	13.66	5.72	5.93	5.825	6.42	4.73	5.575
10	20.98	40.1	30.54	25.9	21.13	23.515	26.32	30.17	28.245	10.86	9.37	10.115	12.19	12.13	12.16	15.75	13.07	14.41	5.79	6.48	6.135	6.9	4.66	5.78
10.5	32.89	54.75	43.82	39.49	31.4	35.445	38.75	44.6	41.675	12.13	9.21	10.67	12.63	12.96	12.795	15.87	13.2	14.535	5.65	6.76	6.205	6.86	4.66	5.76
11	47.61	69.98	58.795	53.6	45.6	49.6	52.37	59.09	55.73	15.01	10.22	12.615	13.63	14.63	14.13	16.59	14.28	15.435	6.07	6.56	6.315	6.95	4.54	5.745
11.5	62.15	83.87	73.01	66.97	57.19	62.08	65.74	70.17	67.955	18.36	10.83	14.595	15.79	17.07	16.43	17.29	15.22	16.255	5.69	6.36	6.025	6.61	4.7	5.655
12	71.45	93.04	82.245	76.73	70.47	73.6	75.8	79.56	77.68	25.33	15	20.165	18.02	22.93	20.475	19.25	18.75	19	5.63	6.27	5.95	6.64	4.42	5.53
12.5	80.04	97.68	88.86	85.77	82.56	84.165	84.7	88.26	86.48	33.39	22.57	27.98	21.18	32.93	27.055	23.44	25.95	24.695	5.89	6.5	6.195	7.44	4.59	6.015
13	86.65	99.26	92.955	94.09	90.71	92.4	95.63	93.45	94.54	43.37	30.86	37.115	27.32	46.27	36.795	32.08	37.06	34.57	5.94	6.26	6.1	7.01	4.5	5.755
13.5	93.84	99.7	96.77	96.66	91.56	94.11	96.17	93.63	94.9	51.47	41.12	46.295	35.77	56.78	46.275	40.51	49.08	44.795	5.99	6.39	6.19	7.37	4.48	5.925
14	94.95	99.39	97.17	96.61	91.72	94.165	97.11	95.04	96.075	56.08	52.86	54.47	44.82	66.71	55.765	46.81	60.04	53.425	6.06	6.26	6.16	7.21	4.45	5.83
14.5	95.34	99.07	97.205	95.85	92.72	94.285	97.39	95.43	96.41	65.42	63.09	64.255	54.38	76.02	65.2	54.55	70.49	62.52	5.77	6.32	6.045	7.55	4.82	6.185
15	95.88	98.55	97.215	97.36	94.99	96.175	97.29	95.48	96.385	72.15	76.04	74.095	63.96	84.2	74.08	59.08	82.62	70.85	6.37	6.15	6.26	7.55	4.65	6.1
15.5	95.7	97.31	96.505	96.83	94.62	95.725	99.01	97.34	98.175	82.11	81.16	81.635	78.13	87.49	82.81	67.82	89.11	78.465	6.01	6.04	6.025	7.15	4.91	6.03
16	95.81	98.37	97.09	97.26	96.68	96.97	99.03	99.43	99.23	88.89	85.6	87.245	84.85	93.93	89.39	75.82	95.09	85.455	6.06	5.76	5.91	7.1	4.57	5.835
16.5	94.82	97.57	96.195	96.46	98.93	97.695	98.01	97.36	97.685	92.75	93.23	92.99	90.95	95.91	93.43	80.08	94.76	87.42	6.05	6.03	6.04	7.15	4.56	5.855
17	97.77	96.56	97.165	99.91	97.72	98.815	98.56	98.83	98.695	99.61	93.99	96.8	94.56	96.9	95.73	87.77	99.01	93.39	6.54	6.74	6.64	8.03	4.5	6.265
17.5	99.64	96.26	97.95	97.92	97.27	97.595	98.39	97.91	98.15	96.41	94.33	95.37	97.35	96.69	97.02	93.03	99.08	96.055	6.12	5.71	5.915	7.45	4.61	6.03
18	95.12	96.24	95.68	95.15	97.42	96.285	96.81	97.38	97.095	97.7	96.01	96.855	99.18	97.65	98.415	92.34	98.7	95.52	6.35	6.1	6.225	7.05	4.83	5.94
18.5	95.45	96.5	95.975	97.69	96.39	97.04	97.51	96.73	97.12	98.25	98.86	98.555	97.71	97.6	97.655	95.67	98.96	97.315	5.9	6.12	6.01	7.31	4.61	5.96
19	95.64	95.73	95.685	97.69	98.73	98.21	98.19	97.88	98.035	96.8	96.74	96.77	97.86	97.2	97.53	96.88	99.64	98.26	5.94	5.63	5.785	7.16	4.76	5.96
19.5	96.96	95.9	96.43	96.99	93.26	95.125	95.88	94.77	95.325	97.67	93.8	95.735	96.48	94.24	95.36	96.32	96.77	96.545	5.97	6.49	6.23	7	4.61	5.805
20	94.18	95.93	95.055	97.21	95.98	96.595	94.63	93.17	93.9	95.03	99.08	97.055	97.5	95.54	96.52	96.25	94.05	95.15	5.79	5.15	5.47	6.91	4.57	5.74
20.5	93.85	95.28	94.565	97.28	94.62	95.95	95.5	92.68	94.09	96.2	90.44	93.32	97.38	92.8	95.09	94.71	94.56	94.635	5.56	4.23	4.895	6.32	4.5	5.41
21	96.04	95.79	95.915	91.9	93.51	92.705	93.14	92.18	92.66	95.57	98.58	97.075	93.35	96.8	95.075	93.03	95.26	94.145	5.99	4.96	5.475	6.57	4.6	5.585
21.5	96.83	95.83	96.33	94.75	95.77	95.26	93.12	94.07	93.595	95.19	99.37	97.28	96.07	94.35	95.21	95.45	96.7	96.075	6.7	4.74	5.72	6.8	4.54	5.67
22	95.05	95.05	95.05	93.66	95.21	94.435	93.75	90.85	92.3	94.56	96.49	95.525	96.46	93.94	95.2	97.27	96.03	96.65	7.01	4.52	5.765	6.14	4.5	5.32
22.5	95.57	95.16	95.365	93	96.25	94.625	94.72	91.34	93.03	86.82	95.22	91.02	96.55	92.33	94.44	92.92	95.17	94.045	7.27	4.88	6.075	6.3	4.57	5.435
23	94.24	95.23	94.735	92.79	95.01	93.9	95.27	91.74	93.505	93.83	97.78	95.805	92.51	92.27	92.39	97.07	94.05	95.56	6.73	4.27	5.5	6.66	4.54	5.6
23.5	94	95.41	94.705	93.44	96.95	95.195	95.24	92.39	93.815	95.5	95.09	95.295	92.83	92.96	92.895	95.66	95.67	95.665	5.83	4.6	5.215	6.32	4.62	5.47
24	94.45	94.7	94.575	93.59	98.18	95.885	94.17	92.16	93.165	95.12	95.19	95.155	92.42	92.91	92.665	96.07	95.79	95.93	6.25	4.47	5.36	6.43	4.8	5.615

[truncated: 22 more sheets: Figure 3E, Figure 4A, Figure 4B, Figure 4D, Figure 4E, Figure 5A, Figure 5B, Figure 5C, Figure 5D, Figure 5E, Figure 5F, Figure 5G, Figure 5H, Figure 5I, Figure 6A, Figure 6B, Figure 6C, Figure 6D, Figure S1, Figure S2A …]
