# Supplementary material for: Infection-induced glucose starvation triggers NINJ1-dependent macrophage lysis and pathogen escape
Source: Research Square preprint supplement (doi:10.21203/rs.3.rs-7015602/v1), 2025-07-10
Supplement: Supplementary file 1 [file f001390a059db80657c2ba2d.pdf]

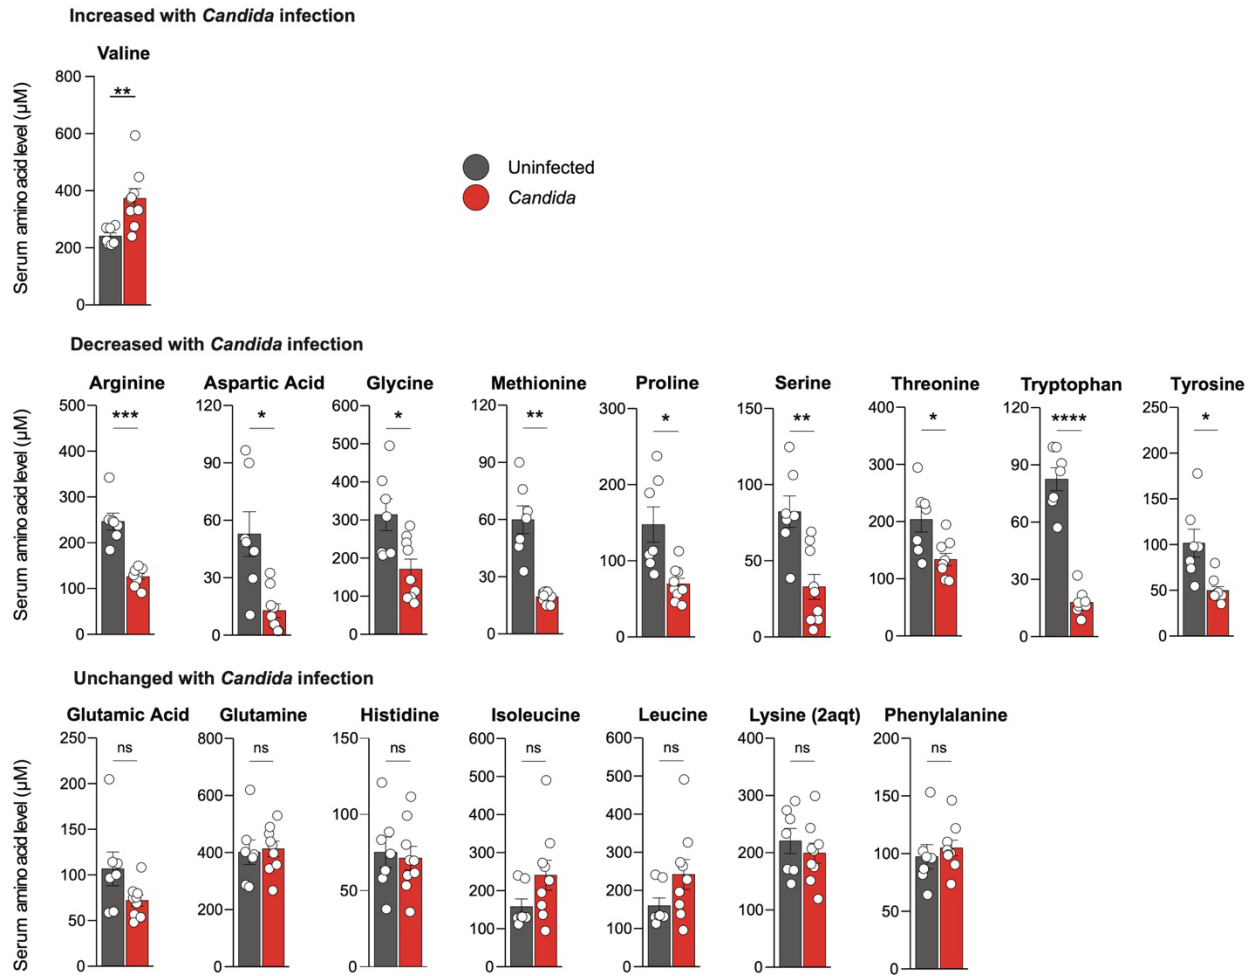

**FIGURE S1. *C. albicans*-infected mice display disrupted amino acids metabolism**

Serum amino acid levels from mice systemically infected with *C. albicans* SC5314, 24 h after infection. Uninfected mice were mock-infected with PBS. Shown are means and SEM of at least 6 individual animals. (students t-test with multiple comparison analysis, \*  $p \leq 0.05$ , \*\*  $p \leq 0.01$ , \*\*\*  $p \leq 0.001$ ). ns-not significant. The alanine data is shown in **Fig. 1A**.

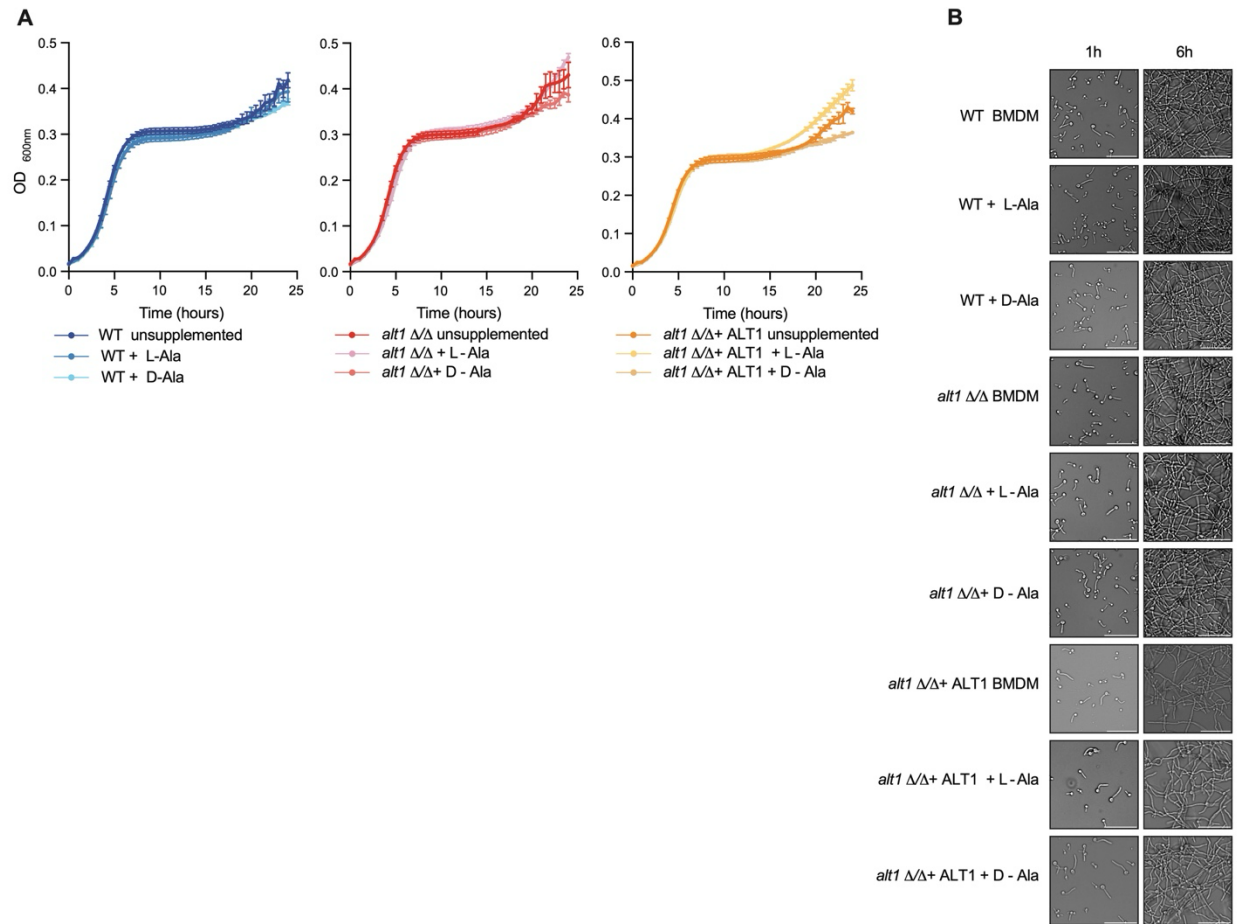

**FIGURE S2. Impact of alanine on *C. albicans* growth and filamentation**

- A.** The growth rate of wild type *C. albicans* (WT), *alt1*  $\Delta/\Delta$ , and *alt1*  $\Delta/\Delta$  + *ALT1* strains in BMDM medium with or without 10 mM L- or D-alanine. The optical density (OD) at 600 nm was measured every 30 min for 24 h at 37 °C. Shown are means and SEM for 3 independent replicates.
- B.** Images of WT, *alt1*  $\Delta/\Delta$ , and *alt1*  $\Delta/\Delta$  + *ALT1* *C. albicans* filamentation in base BMDM medium with or without 10 mM L- or D-alanine. Images were taken at the indicated time points. Scale bar = 50  $\mu$ m.



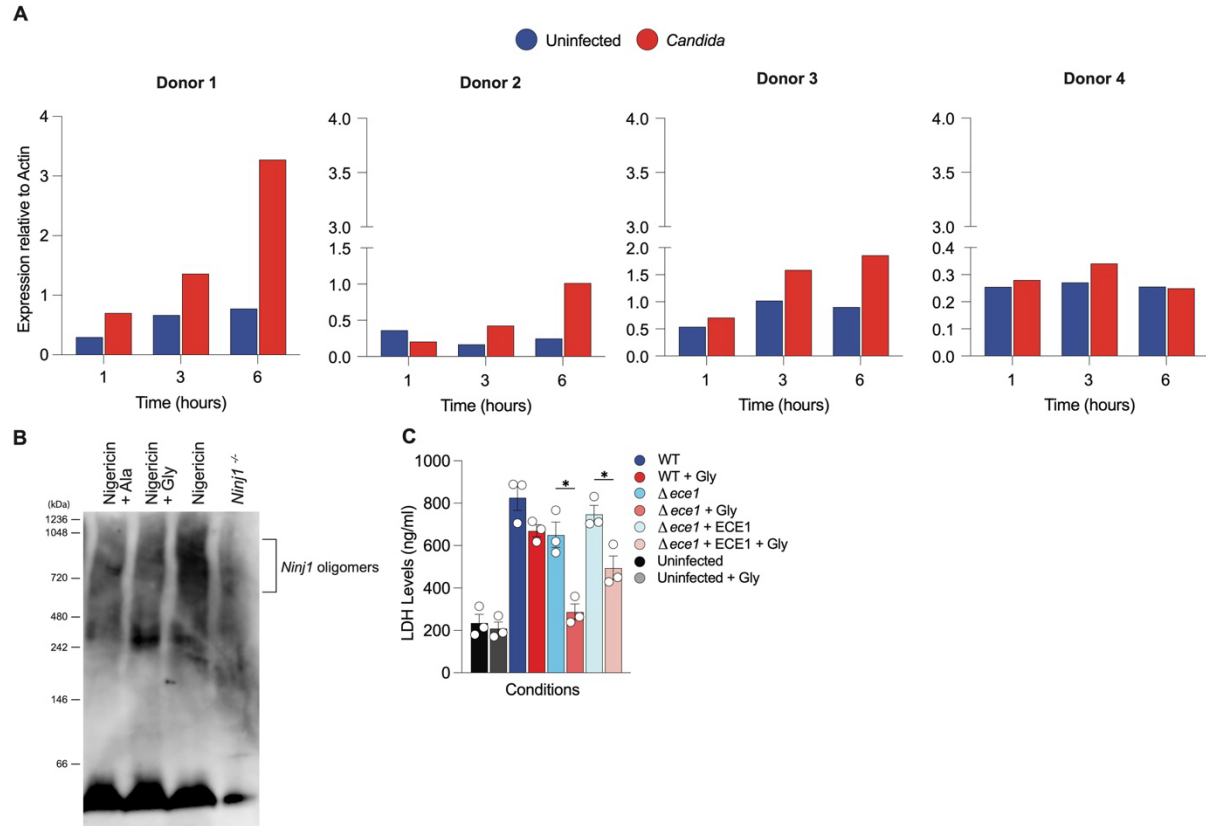

**FIGURE S4. Further characterisation of the roles of NINJ1 following *C. albicans* infection and inhibition with alanine**

- A.** Quantitative PCR analysis of *Ninj1* gene expression in hMDMs after *C. albicans* challenge. Gene expression was normalized to actin (*Act1*). Shown are means from 4 independent donors, each analysed in two technical replicates.
- B.** BN-PAGE of NINJ1 in mouse BMDMs following activation with nigericin, in the presence or absence of glycine and alanine. NINJ1 oligomers are indicated with a square bracket.
- C.** LDH release from tdBLaER1 cells infected with *C. albicans* wild type (WT), *ece1* $\Delta/\Delta$  mutant and *ece1* $\Delta/\Delta$  +*ECE1* revertant. Uninfected cells are shown as control. Samples were taken 24 h post infection. Shown are means and SEM from 3 independent experiments. Measurements for all of WT cells (infected and uninfected groups) were performed and analyzed within the same experiments as those shown **Fig. 5H**, using a shared control group across the figures. (Welsh's t-test correction \*  $p \leq 0.05$ ).

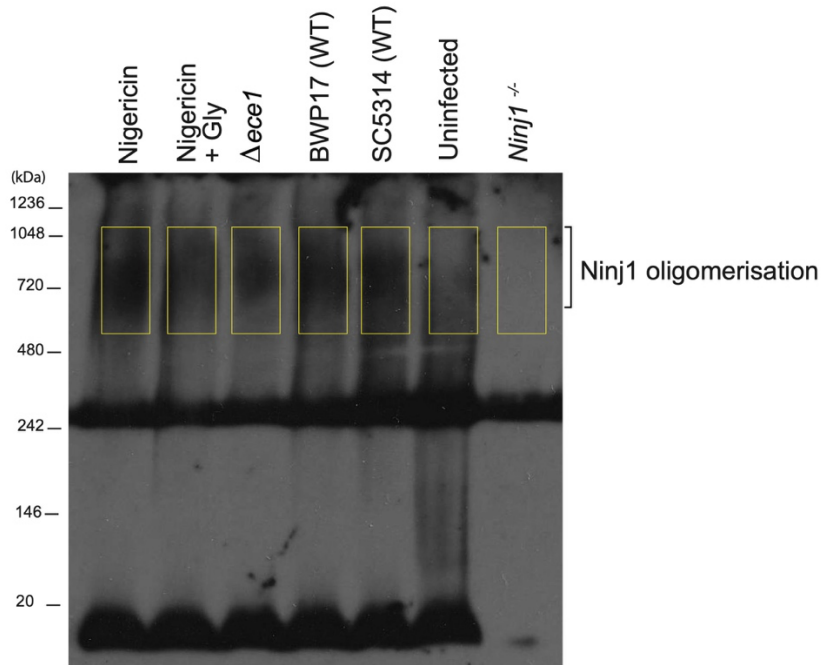

**FIGURE S5. BN-PAGE of NINJ1 following *C. albicans* infection of macrophages.**

BN-PAGE blot of NINJ1 oligomerization in BMDMs at 3 h post infection with WT and *ece1* $\Delta/\Delta$  *C. albicans* strains. The quantified regions are demarcated by a yellow box, between 480 -1048 kDa as determined in <sup>46</sup>. Quantification was performed by ImageJ and is shown in **Fig. 6C**.

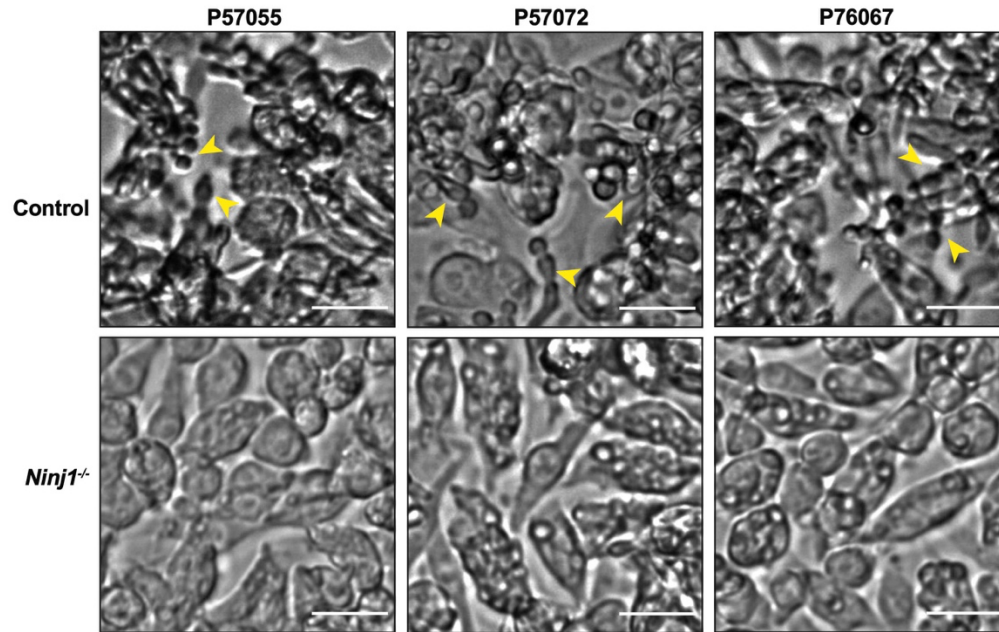

**FIGURE S6. NINJ1 promotes macrophage escape of diverse *C. albicans* clinical isolates**

Still images from live-cell imaging movies of control and *Nin1*<sup>-/-</sup> iBMDMs infected with the indicated *C. albicans* clinical isolates. Yellow arrows indicate escaped hyphae. Images are from 9.5 h post challenge, and are taken from **Movie S2**. Scale bar =100  $\mu$ m.

**Table S1. Strains and cell lines used in this study**

| <b>Experimental models: Cell lines</b>                                                                                                                                                  |                                                                                                                                                    |                                                                               |
|-----------------------------------------------------------------------------------------------------------------------------------------------------------------------------------------|----------------------------------------------------------------------------------------------------------------------------------------------------|-------------------------------------------------------------------------------|
| Wild type iBMDMs: C57BL/6 Cre-J2 background                                                                                                                                             | Gifted by Marco Herold, Walter and Eliza Hall Institute of Medical Research                                                                        | 43                                                                            |
| <i>Casp1</i> <sup>-/-</sup> ; <i>Casp11</i> <sup>-/-</sup> ; <i>Casp12</i> <sup>-/-</sup> ; <i>Casp8</i> <sup>-/-</sup> ; <i>RIP3K</i> <sup>-/-</sup> iBMDMs: C57BL/6 Cre-J2 background | Gifted by Marco Herold, Walter and Eliza Hall Institute of Medical Research                                                                        | 43                                                                            |
| Control iBMDMs: C57BL/6J Cas9+ background <i>Mkl1</i> <sup>-/-</sup>                                                                                                                    | Walter and Eliza Hall Institute of Medical Research                                                                                                | 69                                                                            |
| <i>Ninj1</i> <sup>-/-</sup> iBMDMs: <i>Mkl1</i> <sup>-/-</sup> <i>Ninj1</i> <sup>-/-</sup> C57BL/6J Cas9+ background                                                                    | Walter and Eliza Hall Institute of Medical Research                                                                                                | 69                                                                            |
| <b>Experimental models: Organisms/strains</b>                                                                                                                                           |                                                                                                                                                    |                                                                               |
| Mouse: wild type C57BL/6J                                                                                                                                                               | Monash Animal Research Platform (Melbourne, Australia)                                                                                             | RRID: IMSR_JAX:000664                                                         |
| Mouse: <i>Nlrp3</i> <sup>-/-</sup> C57BL/6J                                                                                                                                             | Walter and Eliza Hall Institute of Medical Research                                                                                                | MGI ID:3721141                                                                |
| Mouse: wild type C57BL/6N                                                                                                                                                               | Monash Animal Research Platform (Melbourne, Australia)                                                                                             | RRID: IMSR_JAX:005304                                                         |
| Mouse: <i>Gsdmd</i> <sup>-/-</sup> C57BL/6J                                                                                                                                             | Walter and Eliza Hall Institute of Medical Research                                                                                                | RRID: IMSR_JAX:032,410                                                        |
| Mouse: <i>Ninj</i> <sup>+/+</sup> C57BL/6J*                                                                                                                                             | Contributed by James Vince, Walter and Eliza Hall Institute of Medical Research                                                                    | MGI ID: 1196617                                                               |
| Mouse: <i>Ninj</i> <sup>-/-</sup> C57BL/6J*                                                                                                                                             | Contributed by James Vince, Walter and Eliza Hall Institute of Medical Research                                                                    | MGI ID: 1196617                                                               |
| <i>C. albicans</i> SC5314, Clade I                                                                                                                                                      | Clinical isolate                                                                                                                                   | Traven lab                                                                    |
| <i>C. albicans</i> P57055, Clade 3                                                                                                                                                      | Clinical isolate, BSI                                                                                                                              | BEI Resources, NIAID, NIH: <i>Candida albicans</i> , Strain P78042, NR-29443. |
| <i>C. albicans</i> P57072, Clade 2                                                                                                                                                      | Clinical isolate, BSI                                                                                                                              | BEI Resources, NIAID, NIH: <i>Candida albicans</i> , Strain P78042, NR-29443. |
| <i>C. albicans</i> P76067, Clade 2                                                                                                                                                      | Clinical isolate, BSI                                                                                                                              | BEI Resources, NIAID, NIH: <i>Candida albicans</i> , Strain P78042, NR-29443. |
| <i>C. albicans</i> P78042, Clade 3                                                                                                                                                      | Clinical isolate, BSI                                                                                                                              | BEI Resources, NIAID, NIH: <i>Candida albicans</i> , Strain P78042, NR-29443. |
| <i>C. albicans</i> SC5314: <i>ece1</i> Δ/Δ                                                                                                                                              | <i>ece1::Δ/ece1::Δ NEUT5L/neut5l::FRT</i>                                                                                                          | This study                                                                    |
| <i>C. albicans</i> M2974: <i>ece1</i> Δ/Δ + <i>ECE1</i>                                                                                                                                 | <i>ece1::Δ/ece1::ECE1, FRT NEUT5L/neut5l::FRT</i>                                                                                                  | This study                                                                    |
| <i>C. albicans</i> : SN152                                                                                                                                                              | <i>leu2Δ/leu2Δ, arg4Δ/arg4Δ, his1Δ/his1Δ, ura3Δ/URA3, iro1Δ/IRO1</i>                                                                               | 67                                                                            |
| <i>C. albicans</i> : SN425,                                                                                                                                                             | <i>leu2Δ::C. dublinensis HIS1/leu2Δ::C. maltosa LEU2, arg4Δ/arg4Δ::C. dublinensis ARG4, his1Δ/his1Δ, ura3Δ/URA3, iro1Δ/IRO1</i>                    | 67                                                                            |
| <i>C. albicans</i> : <i>alt1Δ/Δ</i>                                                                                                                                                     | <i>alt1Δ::C. dublinensis HIS1/alt1Δ::C. maltosa LEU2, arg4Δ/arg4Δ, leu2Δ/leu2Δ::C. dublinensis ARG4, his1Δ/his1Δ, ura3Δ/URA3, iro1Δ/IRO1</i>       | This study                                                                    |
| <i>C. albicans</i> : <i>alt1Δ/Δ+ALT1</i>                                                                                                                                                | <i>alt1Δ::C. dublinensis HIS1/alt1Δ::C. maltosa LEU2, arg4Δ/arg4Δ, leu2Δ/leu2Δ::ALT1::C. dublinensis ARG4, his1Δ/his1Δ, ura3Δ/URA3, iro1Δ/IRO1</i> | This study                                                                    |

\*Indicates littermate mouse strains



**Table S2. Primers used in this study***F* = Forward primer*R* = Reverse primer

| Name                         | Purpose                            | 5' to 3' sequence                                                                                                                 | Source     |
|------------------------------|------------------------------------|-----------------------------------------------------------------------------------------------------------------------------------|------------|
| qPCR                         |                                    |                                                                                                                                   |            |
| ACT1 (F)                     | For qPCR of <i>ActinA</i>          | CGCCGCCAGCTCACC                                                                                                                   | This study |
| ACT1 (R)                     |                                    | ACGCAGCTCATTGTAGAAGGT                                                                                                             | This study |
| NINJ1 (F)                    | For qPCR of <i>Ninj1</i>           | AGTAGGACACCCAGGACCC                                                                                                               | This study |
| NINJ1 (R)                    |                                    | CTGCAGCTGTCCAGTTCTGA                                                                                                              | This study |
| Strain construction          |                                    |                                                                                                                                   |            |
| sgRNA-ECE1-F                 | For CRISPR deletion of <i>ece1</i> | ATTTGTAAAGCAAAAACAGTAGCACG                                                                                                        | This study |
| sgRNA-ECE1-R                 |                                    | AAAACGTGCTACTGTTTTTGCTTTAC                                                                                                        | This study |
| SM-ECE1-F                    | For CRISPR deletion of <i>ece1</i> | AACAAACAACCTTTCCTTTATTTTACTACCAACT<br>ATTTTCCATTTCGTTAAAAATGCTCAGCA                                                               | This study |
| SM-ECE1-R                    |                                    | TGGAATAAAAGATTAAGCTTGTGGA AAACAA<br>ATTTTTATCTGCTGAGCATTGGTAGTAAA                                                                 | This study |
| ECE1-3'-F- <i>XhoI</i>       | For complementation of <i>ece1</i> | TGCTCTCGAGATAAAAATTTGTTTTCCACAAG<br>C                                                                                             | This study |
| ECE1-3'-R- <i>ApaI</i>       |                                    | AGTAGGGCCCTTAATTAAATGAATAACAAGAA<br>TC                                                                                            | This study |
| ECE1-5'-F- <i>SacI</i>       | For complementation of <i>ece1</i> | TTTTGAGCTCTCATAACCTTAAGAAATTGTTTT<br>C                                                                                            | This study |
| ECE1-3'-comp-R- <i>SacII</i> |                                    | AGTACCGCGGTTAATTAAATGAATAACAAGAA<br>TC                                                                                            | This study |
| ALT1 deletion (F)            | For deletion of <i>ALT1</i>        | CAATAATAATCACAGGCATTTGAAACAAACAA<br>AGAACTAGATACTAATACATATATACAAACA<br>AGAAAATAAATAAAAAAAAAAATTAGACAAT<br>CAATATTTCCCAGTCACGACGTT | This study |
| ALT1 deletion (R)            |                                    | TGTCTTAACCTTTGATTTTTTTTTTTTCTTTTTT<br>GGTTATCATATTTTGATTTTATAGACAAGACA<br>TATATGTACATATATAAATATATATAGGGTAT<br>GTGGAATTGTGAGCGGATA | This study |
| ALT1 complementation (F)     | For complementation of <i>ALT1</i> | CCAGAAATACTCCCCTTTTCTTATTCCTTTCTT<br>TTAAACCGGGCCCCCCTGACTCACCCACTC<br>AACTC                                                      | This study |
| ALT1 complementation (R)     |                                    | ACACCATCGAAAAAGTCGATACATTTGCGGTA<br>CAGAAATGTTCTTATCGAAACTTCCCGTTTCCA<br>CTGAA                                                    | This study |



**Movie S1. Ninj1 is the effector of glucose starvation-induced macrophage cell lysis during *C. albicans* infection**

**Movie S2. Ninj1 is a macrophage escape factor for *C. albicans* clinical isolates**

**Data S1. Numerical data used to construct the graphs shown in the figures.**  
Data for all graphs in figures is shown here.
